1 **Title: BCG administration promotes the long-term protection afforded by a**  
2 **single-dose intranasal adenovirus-based SARS-CoV-2 vaccine**

3  
4 **Authors:** Dilhan J. Perera<sup>1,2†</sup>, Pilar Domenech<sup>2,3†</sup>, George Giorgi Babuadze<sup>4†</sup>, Maedeh  
5 Naghibosadat<sup>4†</sup>, Fernando Alvarez<sup>2,5†</sup>, Cal Koger-Pease<sup>1,2</sup>, Lydia Labrie<sup>2,5</sup>, Matthew Stuibler<sup>7</sup>,  
6 Yves Durocher<sup>7</sup>, Ciriaco A. Piccirillo<sup>1,2,5</sup>, André Lametti<sup>6</sup>, Pierre Olivier Fiset<sup>6</sup>, Seyyed Mehdy  
7 Elahi<sup>7</sup>, Gary P. Kobinger<sup>8</sup>, Rénaud Gilbert<sup>7</sup>, Martin Olivier<sup>1,2</sup>, Robert Kozak<sup>4,9\*</sup>, Michael B.  
8 Reed<sup>1,2,3\*</sup>, Momar Ndao<sup>1,2,5,10\*</sup>

9  
10 **Affiliations:**

11 <sup>1</sup>Division of Experimental Medicine, McGill University; Montréal, QC, Canada.

12 <sup>2</sup>Infectious Diseases and Immunity in Global Health Program, Research Institute of the McGill  
13 University Health Centre; Montréal, QC, Canada.

14 <sup>3</sup>McGill International TB Centre, McGill University; Montréal, QC, Canada.

15 <sup>4</sup>Department of Biological Sciences, Sunnybrook Research Institute, University of Toronto;  
16 Toronto, ON, Canada.

17 <sup>5</sup>Department of Microbiology and Immunology, McGill University; Montréal, QC, Canada.

18 <sup>6</sup>Department of Pathology, McGill University; Montréal, QC, Canada.

19 <sup>7</sup>Department of Production Platforms & Analytics, Human Health Therapeutics Research Center,  
20 National Research Council Canada; Montréal, QC, Canada.

21 <sup>8</sup>Département de Microbiologie-Infectiologie et Immunologie, Faculté de Médecine, Université  
22 Laval; Québec, QC, Canada.

23 <sup>9</sup>Department of Laboratory Medicine and Molecular Diagnostics, Division of Microbiology,  
24 Sunnybrook Health Sciences Centre; Toronto, ON, Canada.

25 <sup>10</sup>National Reference Centre for Parasitology, McGill University Health Centre; Montréal, QC,  
26 Canada.

27 †These authors contributed equally

28

29 **\*Corresponding Authors:**

30 Dr. Momar Ndao: [Momar.ndao@mcgill.ca](mailto:Momar.ndao@mcgill.ca)

31 Dr. Michael B. Reed: [Michael.reed@mcgill.ca](mailto:Michael.reed@mcgill.ca)

32 Dr. Robert Kozak: [Rob.kozak@sunnybrook.ca](mailto:Rob.kozak@sunnybrook.ca)

33

34 **One sentence summary:** BCG enhances anti-SARS-CoV-2 immunity and protection afforded  
35 by a novel adenovirus-vectored vaccine.

36

37 **Abstract:** Despite medical interventions and several approved vaccines, the COVID-19  
38 pandemic is continuing into its third year. Recent publications have explored single-dose  
39 intranasal (i.n.) adenovirus-based vaccines as an effective strategy for curbing SARS-CoV-2 in  
40 naïve animal models. However, the effects of prior immunizations and infections have yet to be  
41 considered within these models. Here, we investigate the immunomodulatory effects of  
42 *Mycobacterium bovis* BCG pre-immunization on a subsequent S-protein expressing i.n. Ad  
43 vaccination, termed Ad(Spike). We found that Ad(Spike) alone conferred long-term protection  
44 from severe SARS-CoV-2 pathology within a mouse model, yet it was unable to limit initial  
45 infection 6 months post-vaccination. While i.n. Ad(Spike) retains some protective effect after 6

46 months, a single administration of BCG-Danish prior to Ad(Spike) vaccination potentiates its  
47 ability to control viral replication of the B.1.351 SARS-CoV-2 variant within the respiratory  
48 tract. Though BCG-Danish had no effect on the ability of Ad(Spike) to generate and maintain  
49 humoral immunity, it promoted the generation of cytotoxic and Th1 responses over suppressive  
50 FoxP3<sup>+</sup> T<sub>REG</sub> cells in the lungs of infected mice. These data demonstrate a novel vaccination  
51 strategy that may prove useful in limiting future viral pandemics by potentiating the long-term  
52 efficacy of next generation mucosal vaccines within the context of the safe and widely  
53 distributed BCG vaccine.

54

55 **Main Text:**

## 56 **INTRODUCTION**

57 The COVID-19 pandemic has resulted in over 754 million cases and over 6.8 million  
58 deaths as of February 2023<sup>1</sup>. Infection with SARS-CoV-2 can cause a broad spectrum of disease  
59 ranging from mild symptoms to severe lung injury and multi-organ failure, potentially leading to  
60 death, especially in the elderly and those with comorbidities<sup>2</sup>. Additionally, there is evidence that  
61 recovered individuals can experience symptoms termed “long COVID,” which can involve  
62 multiple organ systems (e.g., lung, heart, kidneys, liver, etc.)<sup>3</sup>. Consequently, COVID-19 has had  
63 severe consequences on global health and the economy and has been the target of novel  
64 immunization approaches. Vaccination, in combination with public health measures, has  
65 effectively slowed the progression and hospitalization rates associated with SARS-CoV-2<sup>4</sup>;  
66 however, these immunization strategies have so far failed to fully prevent viral transmission and  
67 infection<sup>5</sup>. Moreover, vaccine efficacy at preventing infection declines by six months after full  
68 vaccination<sup>6</sup>, and breakthrough infections, especially by novel SARS-CoV-2 variants, have been

69 reported in previously vaccinated individuals<sup>7</sup>. Indeed, current vaccination efforts have largely  
70 focussed on humoral immunity, which wanes over time<sup>8,9</sup>, leading experts to postulate that if  
71 long lasting protection is to be achieved, an effective memory T-cell response must be generated  
72 against COVID-19 and its variants<sup>10,11</sup>. In addition, there is an urgent need to provide equitable  
73 access to affordable and effective vaccines amongst developing nations to prevent the ongoing  
74 morbidity and mortality as well as reduce the risk of novel variants emerging.

75         Among the strategies in preclinical development, a most promising approach involves the  
76 use of intranasal (i.n.) vaccines, theoretically capable of eliciting local mucosal immune  
77 responses within the respiratory tract that can effectively neutralize SARS-CoV-2 entry and  
78 prevent viral replication at the site of initial infection<sup>12</sup>. However, while some vaccines are  
79 undergoing phase I/II clinical trials, the success of this approach has thus far been elusive<sup>13</sup>. For  
80 example, i.n. administration of a chimpanzee adenovirus-based vaccine carrying the Spike  
81 protein (ChAd-SARS-CoV-2-S) successfully generated neutralizing IgA antibodies and T-cell  
82 responses in the lungs of hACE-2 mice<sup>14</sup> and provides at least one month of protection in mice  
83 and rhesus macaques<sup>15</sup>. However, a recent progress report from a phase I clinical trial of the i.n.  
84 administration of ChadOx1 has announced a failure to substantially increase mucosal immunity  
85 in humans<sup>16</sup>. Nonetheless, the safety results were sufficiently encouraging to pursue approaches  
86 that enhance mucosal immunity generated using adenovirus vaccine vectors.

87         In many countries, the live-attenuated *Mycobacterium bovis* Bacillus Calmette-Guérin  
88 (BCG) vaccine is administered to newborns soon after birth to protect them from disseminated  
89 *Mycobacterium tuberculosis* infection. In fact, most individuals worldwide are BCG vaccinated;  
90 of the approximately 140 million babies born per year, approximately 100 million of them are  
91 vaccinated with BCG<sup>17</sup>. Curiously, vaccination with BCG has been reported also to reduce child

92 mortality<sup>18</sup> from neonatal sepsis and lower respiratory tract infections<sup>19</sup>. There is cumulating  
93 evidence that BCG acts on the antiviral immune response by boosting the activity of innate  
94 immune cells, a concept known as trained immunity<sup>20</sup>, as well as by promoting heterologous T  
95 cell activation<sup>21</sup>. As such, many researchers have speculated on the possibility that BCG could  
96 provide immunity against SARS-CoV-2 infection<sup>22</sup>, although there are mixed experimental data  
97 thus far to support this idea<sup>23,24</sup>. Still, there remains great promise that BCG can be combined  
98 with conventional SARS-CoV-2 vaccination strategies to improve their effectiveness<sup>25</sup>. As such,  
99 we hypothesized that BCG may provide a novel, cost-effective, and safe priming strategy to  
100 enhance the long-term efficacy of i.n. immunization with adenovirus-based COVID-19 vaccines.

101         Here, we sought to evaluate the effect of prior administration of BCG on the  
102 immunogenicity and efficacy of an i.n. human adenovirus serotype 5 (AdV) vaccine expressing  
103 the SARS-CoV-2 S (Spike)-protein, referred to as Ad(Spike), in a mouse model of infection with  
104 the B.1.351 variant of SARS-CoV-2. Previous work has shown that a single i.n. immunization  
105 with adenovirus-based vaccines against SARS-CoV-2 is sufficient to provide effective protection  
106 from infection in naïve animals<sup>26</sup>. In this report, we demonstrate that the protection conferred by  
107 our intranasally administered Ad(Spike) vaccine alone declines in mice by 6 months post-  
108 immunization. Importantly, a single dose of BCG administered prior to Ad(Spike) vaccination  
109 was capable of specifically boosting the Spike-specific cytotoxic T-cell response in the lungs  
110 and, in doing so, significantly decreasing the replication and production of infectious viral  
111 particles up to 6 months after i.n. immunization with the Ad(Spike) vaccine. These results show  
112 a novel and innovative approach to the use of heterologous vaccine strategies incorporating the  
113 widely approved BCG vaccine to protect against current and future viral pandemics.

114

115 **RESULTS**

116

117 **The *in vivo* protection provided by a single dose of intranasal recombinant Ad(Spike)**  
118 **attenuates with time**

119 To investigate the long-term protection provided by i.n. vaccine administration, we  
120 developed a replication-deficient ( $\Delta E1-$ ,  $\Delta E3-$ ) human adenovirus serotype 5 expressing the full-  
121 length S-protein of the ancestral strain of SARS-Co-V-2 (Ad(Spike)) which was codon  
122 optimized for expression in human and mouse cell lines (Figure 1a). Exogenous gene expression  
123 was verified *in vitro* by western blot using S-protein specific antibodies (Figure 1b). Female  
124 C57BL/6 mice were vaccinated with either PBS or  $10^9$  TCID<sub>50</sub> Ad(Spike) intranasally. The  
125 infectious dose of Ad(Spike) was determined using a pilot study and was chosen based on the  
126 induction of Spike-specific IgA antibodies in lung homogenates from vaccinated animals  
127 (Supplemental Figure 1). Study animals were challenged 2 or 6 months later with the Beta  
128 variant (B.1.351) of SARS-CoV-2. In each case, the animals were followed for 5 days post-  
129 infection (dpi) to determine viral shedding from oral swabs (3-dpi) and the viral load in the lungs  
130 at 5-dpi (Figure 1c).

131 As expected, Ad(Spike)-immunized mice displayed a significant reduction in the  
132 production of infectious SARS-CoV-2 in oral swabs 2 months after vaccination (Figure 1d).  
133 However, when challenged 6 months post-vaccination, viral titres in vaccinated animals were  
134 comparable to unvaccinated mice (Figure 1d). Similarly, infectious viral titres (Figure 1e) and  
135 SARS-CoV-2 RNA (Figure 1f) assessed directly in the lungs of infected animals at 6 months  
136 post-vaccination were not statistically different from unvaccinated mice as opposed to data from  
137 mice challenged 2 months after immunization, where significant differences were observed.

138 These findings reveal that the protection from infection conferred by a single-dose Ad(Spike) i.n.  
139 vaccine against SARS-CoV-2 is short-lived, waning over time.

140

### 141 **BCG administration prolongs the protective effect of Ad(Spike) in immunized mice**

142 We next investigated the effectiveness of a prime-boost vaccination regimen using BCG.  
143 Female C57BL/6 mice were pre-immunized with  $10^6$  colony forming units (CFU) of the BCG-  
144 Danish strain containing an empty plasmid (BCG(e)) intraperitoneally (i.p.), 1 month prior to i.n.  
145 Ad(Spike) vaccination (month 0). Naïve controls received the vehicle (PBS) in place of both  
146 BCG(e) and Ad(Spike). First, we tested the possibility that BCG alone could provide non-  
147 specific protection against SARS-CoV-2 in our animal model, since reports from human data are  
148 controversial<sup>27</sup>. Animals were pre-immunized with BCG(e) and vaccinated with an adenoviral  
149 vector containing an empty gene cassette (Ad(e)) before challenge with SARS-CoV-2 two  
150 months later. Mice pre-immunized with BCG-Danish displayed no significant reduction in  
151 infectious viral titres or viral RNA in oral swabs or lungs (Supplemental Figure 2) compared to  
152 PBS controls, confirming the BCG-Danish vaccine did not provide significant non-specific  
153 protection to challenged mice<sup>23,28</sup>.

154 We then investigated the effect of prior BCG-Danish administration on the duration of  
155 our Ad(Spike) vaccine 6 months after vaccination (Figure 2a) by quantifying the daily variation  
156 in viral replication and infectious particles in oral swabs and the pulmonary tissue of mice  
157 infected with SARS-CoV-2. Here, we found that while a single dose of i.n. Ad(Spike) could  
158 reduce infectious viral particles in oral swabs at 1- and 3-dpi, mean viral titres in animals that  
159 were first pre-immunized with BCG were significantly lower than those that were not (Figure  
160 2b). At 5 dpi, we assessed also the reduction of viral RNA in oral swabs (Figure 2c), infectious

161 virus in the lungs measured by TCID<sub>50</sub> (Figure 2d), and viral RNA in the lungs (Figure 2e). We  
162 found that by 6 months post-vaccination, although a single dose of Ad(Spike) was able to reduce  
163 viral burden, compared to controls, this reduction was not statistically significant. However,  
164 significance was rescued in animals that first received BCG(e), revealing that while i.n.  
165 Ad(Spike) retains some protective effect after 6 months, a single administration of BCG-Danish  
166 prior to Ad(Spike) vaccination potentiates its ability to control viral replication within the  
167 respiratory tract.

168

### 169 **Ad(Spike)-vaccinated animals are protected from SARS-CoV-2-induced pathology 6** 170 **months post-vaccination**

171 SARS-CoV-2 infection in C57BL/6 mice causes severe pulmonary inflammation  
172 characterized by immune cell infiltration, lung atelectasis, and bronchial constriction. Since we  
173 observed a greater reduction of viral particle load in BCG-Danish exposed mice, we next  
174 assessed the extent of pulmonary damage at 6 months post-Ad(Spike) vaccination, both with and  
175 without BCG pre-immunization. Scoring of lung pathology showed an overall significant  
176 reduction in cellular and tissue damage (CTL), circulatory/vascular damage (CVL), and  
177 inflammatory patterns (RIP) in all Ad(Spike) vaccinated animals that was not observably  
178 enhanced through pre-immunization with BCG(e) (Figures 3a-b-c; Supplemental Table 1).  
179 However, we could not distinguish the protective effect of BCG-Danish, as both groups  
180 displayed a significant reduction in lung pathology. Collectively, these results confirm that while  
181 a single i.n. dose of Ad(Spike) vaccine fails to prevent infection, it potently protects against  
182 SARS-CoV-2-induced severe lung pathology as long as 6 months post-vaccination.

183



184 **Ad(Spike)-induced antibody profiles are not influenced by pre-immunization with BCG**

185       Vaccine protection against SARS-CoV-2 infection is largely attributed to its ability to  
186 generate high quantities of neutralizing antibodies, although the potential role of BCG in  
187 promoting antibody production remains to be assessed. To determine if BCG influenced the  
188 quantity and affinity of the antibody response generated by Ad(Spike), we bled immunized  
189 animals at select timepoints pre- and post-vaccination. Antibody titres against the full Spike  
190 protein (Figure 4) and the receptor binding domain (RBD) (Supplemental Figure 3) were  
191 assessed via ELISA. Expectedly, animals in the PBS and BCG(e)+Ad(e) groups did not produce  
192 Spike or RBD-specific serum antibodies throughout the study. Spike-specific IgG was detectable  
193 at high levels 1 month after vaccination and continued to rise until 2 months after vaccination  
194 when levels slowly declined until the end of the study for both Ad(Spike) and  
195 BCG(e)+Ad(Spike) groups (Figure 4a). Although RBD-specific IgG was significantly higher in  
196 Ad(Spike) animals than those that received BCG(e)+Ad(Spike) at 1 month post-vaccination, this  
197 difference was not present at later time points (Supplemental Figure 3a). As such, Spike-specific  
198 IgG was similar between vaccinated groups.

199       Since BCG is known to induce  $\text{IFN}\gamma^{29}$ , a known promoter of IgG2c production<sup>30</sup>, we then  
200 addressed if BCG influenced the isotype of antibodies produced upon Ad(Spike) vaccination in  
201 the animals prior to challenge. Both groups of vaccinated animals similarly expressed Spike-  
202 specific IgG1 (Figure 4b) and IgG2c (Figure 4c) and displayed the same ratio of IgG1/IgG2c  
203 (Figure 4d). Correspondingly, both groups of vaccinated animals expressed similar levels of  
204 RBD-specific IgG1 (Figure S3d) and IgG2c (Figure S3e) in similar ratios (Supplemental Figure  
205 3f), confirming that BCG-Danish pre-immunization did not influence isotype-switching upon  
206 Ad(Spike) vaccination.

207 We then assessed IgG avidity by ELISA. As expected, Spike- and RBD-specific IgG  
208 avidity rose from 0- to 2-months (Figure 4e and Supplemental Figure 3b, respectively) and  
209 Spike-specific avidity was maintained in both vaccinated groups until 6 months, demonstrating  
210 that BCG did not influence the avidity of IgG. Interestingly, RBD-specific IgG avidity dropped  
211 at 6-months to levels similar to those observed at one-month post-vaccination (Supplemental  
212 Figure 3c), suggesting that neutralisation of the ACE2-Spike binding domain declines with time  
213 in both groups. In addition, a cPass surrogate virus neutralization assay confirmed that BCG did  
214 not influence the abundance of neutralizing antibodies within immunized mice (Figure 4f)  
215 compared to mice vaccinated with Ad(Spike) alone. Intranasal vaccination with Ad(Spike) also  
216 resulted in detectable levels of antigen-specific serum IgA in both groups (Figure 4g), prompting  
217 us to investigate levels of mucosal antibodies. Bronchoalveolar lavage fluid (BALF)-derived  
218 Spike-specific IgG antibodies were present and statistically greater than negative controls at 2  
219 and 6 months post-vaccination (Figure 4h). This was observed also for RBD-specific IgG  
220 responses in BALF prior to infection (Figure S3h). Specifically, Spike-specific IgG1 (Figure 4i)  
221 and IgG2c (Figure 4j), as well as their ratio (Figure 4k), did not differ between the two  
222 vaccinated groups. The same pattern was observed for RBD-specific IgG1 (Figure S3i), IgG2c  
223 (Figure S3j), and the ratio of the two (Figure S3k). The mean neutralizing activity of BCG-pre-  
224 immunized and vaccinated animals was two-fold greater than those animals that were solely  
225 Ad(Spike) vaccinated, though this difference was not significant (Figure 4l). This trend of higher  
226 antibody levels in the BALF from pre-immunized and vaccinated animals was again seen with  
227 the Spike-specific IgA (Figure 4m) and RBD-specific IgA (Figure S3l) titres; though, again the  
228 difference was not statistically significant. Taken together, these data show that pre-  
229 immunization with BCG-Danish does not promote the persistence of Ad(Spike)-induced

230 protection by modulating the generation, quantity, or quality of circulating or mucosal humoral  
231 responses.

232

### 233 **BCG pre-immunization promotes long-term cellular immunity in the lungs**

234 An important aspect of vaccination is to generate robust and lasting tissue-resident  
235 memory T cells ( $T_{RM}$ ) in order to confer protection<sup>31</sup>. Since we observed that BCG-Danish did  
236 not impact the long-term protective antibody response Ad(Spike) generated against SARS-CoV-  
237 2, we next investigated if BCG-Danish pre-immunization potentiated the generation of memory  
238  $CD4^+$  and  $CD8^+$   $T_{RM}$  cells in infected mice. Six months post-vaccination, isolated lung T cells  
239 were activated with SARS-CoV-2 Spike protein peptides (Figures 5a; S4). As shown in Figure  
240 5b, at 6 months post-vaccination, the frequencies of lung  $CD8^+$  T cells from immunized groups  
241 were significantly greater than controls regardless of BCG administration. However, when we  
242 assessed the production of Granzyme B (GrB) and  $IFN\gamma$  in activated  $CD69^+$   $CD8^+$   $T_{RM}$  cells, we  
243 observed that mice that received BCG(e) prior to immunization with Ad(Spike) produced a  
244 higher frequency of GrB- (Figure 5c) and  $IFN\gamma$ -secreting  $CD8^+$  T cells (Figure 5d) compared to  
245 the singly vaccinated group 6 months post-vaccination, suggesting that their responses are more  
246 cytotoxic in nature. In parallel, we observed an increase in activation ( $CD69^+$ ) of  $CD4^+$  T cells  
247 upon peptide restimulation in the immunized group that was previously exposed to BCG (Figure  
248 5e). In fact, mice pre-immunized with BCG, regardless of Ad(Spike) vaccination, had increased  
249 frequencies of  $IFN\gamma^+$   $CD4^+$  (Figure 5f) and  $IL17A^+$   $CD4^+$  T cells in the lung (Figure 5g),  
250 although these trends did not reach statistical significance. Coincidentally, we observed also  
251 significantly less FoxP3<sup>+</sup> regulatory T ( $T_{REG}$ ) cells among  $CD69^+$   $CD4^+$  T cells (Figure 5h),  
252 suggesting that BCG promotes the generation of cytotoxic over suppressive T-cell responses in

253 BCG(e)+Ad(Spike)-immunized mice relative to the other treated groups. Collectively, these  
254 results demonstrate that BCG pre-immunization acts on the long-term potency of the Ad(Spike)  
255 vaccine by promoting the generation of cytotoxic and Th1 responses over suppressive FoxP3<sup>+</sup>  
256 T<sub>REG</sub> cells in the lungs of infected mice.

257

### 258 **Ad(Spike) cross-reactive antibodies persist and are not affected by BCG pre-immunization**

259 One goal of vaccine development is to promote heterologous reactivity. This is  
260 particularly the case with the rapidly evolving SARS-CoV-2 virus where ongoing emergence of  
261 novel variants is an important and continuing public health concern. Thus, we assessed if the  
262 administration of BCG affected the ability of Spike antibodies generated by an i.n. Ad(Spike)  
263 vaccine based on the ancestral (Wuhan) sequence to subsequently recognize epitopes from  
264 SARS-CoV-2 alpha (B.1.1.7), beta (B.1.351), gamma (P.1), delta (B.1.617.2), and omicron  
265 variants (B.1.1.529, and BA.2). Six months post-vaccination, serum IgG titres against the  
266 ancestral S-protein within Ad(Spike)- and BCG(e)+Ad(Spike)-vaccinated animals were not  
267 significantly different between the two vaccinated groups (Figure 6a). To ensure BCG pre-  
268 immunization does not affect the cross-reactivity of these antibodies, we conducted ELISAs  
269 against S-proteins from variant strains of SARS-CoV-2. We found no significant reduction in the  
270 antibody binding capacity of serum from vaccinated animals that were vaccinated with  
271 Ad(Spike) (Figure 6b) or pre-immunized with BCG and then vaccinated with Ad(Spike) (Figure  
272 6c) against any of the SARS-CoV-2 strains. These results confirm that BCG administration does  
273 not affect the generation of cross-reactive anti-Spike antibodies.

274

### 275 **DISCUSSION**

276 A single intranasal dose of a human adenovirus vectored vaccine has been shown to be  
277 sufficient to protect mice from SARS-CoV-2 infection and severe disease<sup>32</sup>. However, the  
278 durability of protection from these vaccines remains to be established as most studies utilize  
279 short-term challenge models. Using an AdV vectored vaccine that expresses the Spike protein of  
280 the Wuhan isolate, and then challenging with the Beta variant of SARS-CoV-2, we demonstrated  
281 that a single i.n. dose of a human AdV-based vaccine could cross-protect mice from severe  
282 disease months after immunization. Specifically, our Ad(Spike) vaccine successfully prevented  
283 mice from developing severe pulmonary pathology when challenged with SARS-CoV-2 2- and  
284 6-months post-vaccination. However, the ability of vaccinated mice to limit initial infection was  
285 diminished by 6 months post-immunization, with viral shedding in oral swabs greater than earlier  
286 challenge experiments, confirming what was observed in a recent meta-analysis<sup>6</sup>. Thus, we  
287 aimed to develop a strategy to prolong the mucosal immunity provided by i.n. administration of  
288 Ad(Spike) by harnessing the non-specific effects of BCG<sup>33,34</sup>. Here, we demonstrate that BCG  
289 improved the long-term protection and viral control conferred by a single i.n. Ad(Spike) by  
290 potentiating cellular, rather than humoral, immunity against the Spike antigen in the lungs.

291 SARS-CoV-2 continues to cause morbidity and mortality, nearly three years after its  
292 emergence in December 2019, due to factors such as variants and breakthrough infections caused  
293 by waning immunity from vaccines and/or natural infection. In fact, data show that despite short-  
294 term efficacy, antibody levels associated with the current COVID-19 vaccines wane over  
295 time<sup>35,36</sup> and is insufficient to completely prevent infection and transmission<sup>5</sup>. Thus, improved  
296 vaccines and novel routes that increase mucosal immunity<sup>12,37</sup> are needed. Indeed, several groups  
297 have demonstrated that when adenovirus vectored SARS-CoV-2 vaccines are administered  
298 intranasally, a single immunization is sufficient to confer protection from infection in naïve

299 animals<sup>38,39</sup>. However, clinical trials have not yet demonstrated that i.n. AdV vectored vaccines  
300 elicit sufficient or lasting immunity to prevent SARS-CoV-2 replication and transmission<sup>13</sup>. As  
301 such, safe immune strategies aiming at potentiating these mucosal responses are currently being  
302 explored. One promising option, investigated herein, is based on the ability of the BCG vaccine  
303 to act as an indirect promoter of cellular immunity. For many years, BCG has been approved for  
304 use in infants across the globe to protect against severe, disseminated forms of TB. As such,  
305 BCG is commonly reported as the world's most widely used vaccine and has an excellent safety  
306 record. However, BCG has also recently been shown to reduce mortality due to unrelated  
307 infectious agents, including several viruses, as a result of its non-specific, immune-enhancing  
308 effects<sup>33,40</sup>. Here we sought to investigate the effect of BCG administration on the efficacy and  
309 durability of an i.n. human AdV vectored SARS-CoV-2 vaccine. Overall, we found that pre-  
310 immunization with BCG can non-specifically rescue waning immunity from a single-dose, i.n.  
311 SARS-CoV-2 vaccine by potentiating local vaccine-specific cell mediated responses without  
312 hindering humoral immunity.

313         The possible contribution of widespread BCG vaccination to SARS-CoV-2 protection in  
314 human populations is still unclear; yet, there is growing evidence that BCG vaccination provides  
315 'trained immunity' to innate mechanisms<sup>40-42</sup>, which can have antagonistic effects on other  
316 unrelated pathogens<sup>23,34,43,44</sup>. This is seen in the curious protection from neonatal sepsis and  
317 respiratory infections conferred to BCG immunized babies<sup>19</sup>. It has since been demonstrated that  
318 due to intrinsic pathogen associated molecular pattern activation of toll like receptors, BCG  
319 induces the activation and reprogramming of monocytes<sup>29,40,41</sup>, resulting in increased expression  
320 of cell surface markers and the production of pro-inflammatory cytokines and IFN $\gamma$  in response  
321 to antigenic stimulation<sup>45</sup>. These data contributed to the hypothesis that BCG may provide

322 heterologous potentiation of antigen-presenting cell (APC) function to improve the  
323 immunogenicity and efficacy of vaccines, as made evident in human studies of neonatal  
324 vaccinations<sup>46,47</sup> and adult influenza vaccination<sup>48</sup>. In fact, BCG is a natural adjuvant that is at  
325 least partly a result of its modified peptidoglycan structure and unusual cell-wall lipid  
326 composition<sup>49</sup> and has been exploited in several novel vaccine efforts including against SARS-  
327 CoV-2<sup>28,50,51</sup>. It is particularly impressive that BCG has the potential to deliver benefit to  
328 vaccination strategies even when not directly co-administered. Nevertheless, BCG alone does not  
329 seem to provide direct protection from SARS-CoV-2. While an early study in humans suggested  
330 protective efficacy against SARS-CoV-2 from BCG vaccination<sup>52</sup>, a recent case study  
331 demonstrated that this protection was not attributable to BCG over the course of the pandemic  
332 due to an underreporting of COVID-19 cases in regions with high BCG-vaccination rates<sup>27,53</sup>.  
333 Another group found that BCG alone, failed to provide protection from SARS-CoV-2 in mice  
334 and hamsters<sup>23</sup>, although this may depend upon the route of administration. Nonetheless, our data  
335 support the idea that BCG alone (nor when combined with an empty AdV vaccine vector) does  
336 not confer significant protection against SARS-CoV-2 challenge in a mouse model of infection.

337       As noted above, data show that despite short-term efficacy, protection from SARS-CoV-  
338 2 infection wanes over time in humans<sup>35,36</sup>. Consistent with this, we also observed an attenuation  
339 of protection by 6 months post-immunization. Although prior exposure to BCG did not change  
340 Ad(Spike) protection 2 months post-vaccination (Supplemental Figure 2), when mice were  
341 primed with BCG and then vaccinated with Ad(Spike), significant protection was maintained for  
342 at least 6 months post-vaccination. Due to the numerous possible effects of BCG on the innate  
343 and adaptive immune responses, we chose to focus on its impact on the type of humoral  
344 immunity generated by a single-dose Ad(Spike) vaccine by first assessing the quality and

345 quantity of serum and BALF antibodies. We observed that regardless of their exposure to BCG,  
346 mice that were vaccinated with Ad(Spike) displayed robust serum and BALF Spike-specific  
347 antibodies, both IgG and IgA which, while slowly declining, were maintained at high titres to at  
348 least 6 months post-vaccination. These antibodies maintained high affinity to the receptor  
349 binding domain of the Spike protein, confirming that they were capable of neutralizing viral  
350 entry. Reassuringly, these antibodies also displayed cross-reactivity against all Spike variants  
351 tested, including the beta variant, which was used in our challenge study. However, despite these  
352 seemingly high titres of neutralizing IgG1/2c and IgA antibodies, viral RNA and, to a lesser  
353 degree, live viral particles remained high in the absence of BCG. Thus, we hypothesized that the  
354 bacilli promoted cellular rather than humoral immunity in BCG(e)+Ad(Spike)-immunized mice.

355 Our antigen-specific assay demonstrated that although Ad(Spike) alone showed a trend  
356 towards increased expression of cytotoxic activity in antigen-primed T cells, these differences  
357 became significant only in mice that were pre-immunized with BCG. Indeed, BCG has been  
358 shown to enhance intramuscular vaccine-induced circulating Spike-specific CD4<sup>+</sup> T cells in  
359 humans<sup>25</sup>, and our results reveal that it can also potentiate the generation of antigen-specific  
360 CD4<sup>+</sup> T cells in tissues. Many reports suggest BCG acts by training monocytes to have higher  
361 expression of MHC-II, CD80, and CD86, enhancing antigen presentation to T cells<sup>54,55</sup>.  
362 Concomitantly, adaptive immune responses after BCG vaccination also involves the activation of  
363 CD8<sup>+</sup> T cells<sup>34</sup>. Here, we observed a clear potentiation of Spike-specific cytotoxic CD8<sup>+</sup> T cells  
364 up to at least 6 months after vaccination. Furthermore, cytokines secreted by BCG-exposed  
365 monocytes, such as IL1 $\beta$  and IL6, are key contributors to CD4<sup>+</sup> T-cell differentiation into Th1  
366 and Th17 subsets<sup>56,57</sup> which is consistent with the increased CD4<sup>+</sup> T-cell expression of IFN $\gamma$  or  
367 IL17a we observed in BCG-immunized mice even in the absence of Ad(Spike). Thus, likely, our



368 assay could not distinguish Spike-specific from bystander Th1 and Th17 cells generated prior to  
369 BCG administration.

370 Our study used wild-type C57BL/6 mice, which necessitated using a SARS-CoV-2 strain  
371 that binds the mouse ACE-2 (mACE-2) receptor. For this reason, we challenged the C57BL/6  
372 mice with the B.1.351 strain, capable of binding mACE-2 and establishing infection<sup>58</sup>. Thus, we  
373 demonstrated cross-protection delivered by our ancestral strain-based AdV vaccine in a context  
374 of SARS-CoV-2 infection, which resembles human disease<sup>59</sup>. However, these mice are not  
375 typically used for SARS-CoV-2 vaccine studies, as C57BL/6 mice do not display all the  
376 hallmark features of severe pathology and typically recover from infection<sup>60</sup>. As follows, the  
377 lung pathology observed in our model was modest, posing a limitation in our ability to  
378 discriminate severe disease between vaccinated groups. Furthermore, although lung-cell  
379 memory responses were increased in BCG pre-immunized animals, our long-term infection  
380 model of 6 months post-vaccination may have been insufficient to clearly assess the synergistic  
381 effects of BCG on Ad(Spike). We propose that the roles these memory responses play may  
382 become more obvious in longer-term studies when protection from Ad(Spike) alone is further  
383 reduced.

384 Despite the limitations of our study, we offer insight into the effects of prior BCG  
385 immunization on reinforcing vaccine efficacy in a mouse model of SARS-CoV-2. Interestingly,  
386 due to the long-term persistence of viable BCG in our experimental design (Supplemental Figure  
387 4), this study also raises the issue of vaccine efficacy in the context of other persistent bacterial  
388 co-infections, as well as components of the normal mucosal microbiota, and represents an  
389 important future line of inquiry. As preclinical vaccine testing is conducted in naïve animals, the

390 role of immunological memory from previous vaccination and persisting infections should be  
391 addressed in relation to vaccine efficacy.

392 Collectively, our results present a novel vaccination approach that can potentially curb  
393 viral pandemics by potentiating the long-term efficacy of a next-generation adenovirus-vectored  
394 mucosal vaccine when provided in the context of the safe and widely distributed BCG vaccine.  
395 This approach can also have an impact in other mucosal and non-mucosal vaccination strategies  
396 as well. Going forward, these strategies also may provide a viable solution to ensure a more rapid  
397 and equitable distribution of vaccines among developing nations where BCG is already firmly  
398 entrenched within many vaccination programs. In addition, the combination with BCG also may  
399 serve to alleviate concerns over the safety of adenoviral-based vaccines, as it may allow for a  
400 reduced dosing schedule or a reduction in the viral titre required to achieve effective vaccination.

401

## 402 **MATERIALS AND METHODS:**

403

### 404 **Study design**

405 The primary objective of this study was to determine the effect of BCG on subsequent  
406 vaccination with a recombinant SARS-CoV-2 S-protein expressing adenoviral vectored vaccine.  
407 Experimental units are defined as individual animals. Sample sizes were empirically estimated  
408 based on previous data considering the anticipated variation of the results and statistical power  
409 needed, while also minimizing the number of animals used. C57BL/6 mice were randomly  
410 attributed to treatment groups. To minimise potential confounders, mice were matched for age  
411 and sex. Blinding: For all challenge experiments, staff performing infections and sample  
412 harvesting were blinded to the different groups and were only unblinded after data analysis.

413 Inclusion/Exclusion: Aside from a small number of deaths in one of the control groups  
414 (Ad(e)+BCG(e)), no other animals were excluded from the analysis.

415

#### 416 **Animal ethics**

417 All animal procedures were performed in accordance with the Institutional Animal Care and Use  
418 Guidelines approved by the Animal Care and Use Committee at McGill University (Animal Use  
419 Protocol 8190). Mouse housing, husbandry, and environmental enrichment can be found within  
420 the McGill standard operating procedures (SOP) #502, #508, and #509. Animals were monitored  
421 for adverse events for 3 days post-vaccination and weekly until the end of each experiment.  
422 Humane intervention points were monitored according to McGill SOP #410. Challenge  
423 experiments were performed in compliance with the Canadian Council on Animal Care  
424 guidelines and approved by the Animal Care Ethics Committee at the University of Toronto  
425 (APR-00005433-v0002-0). All animals were humanely sacrificed at endpoint by anaesthesia  
426 with isoflurane before euthanasia by carbon dioxide asphyxiation, followed by pneumothorax  
427 and blood collection by cardiac puncture.

428

#### 429 **Cell lines and reagents**

430 Cell lines were obtained from commercial sources, passed quality control procedures, and were  
431 certified and validated by the manufacturer. SF-BMAd-R cells were validated for identity, as  
432 human derived<sup>61</sup>. All reagents were validated by the manufacturer or has been cited previously in  
433 the literature. When available, RRID tags have been listed in the text and in the reagent  
434 repository (Supplemental Table 2).

435

436 ***Mycobacterium bovis* BCG Danish culture**

437 *Mycobacterium tuberculosis* variant *bovis* BCG (ATCC 35733), provided to us by Dr. Marcel  
438 Behr (Research Institute of the McGill University Health Centre), was grown in Middlebrook  
439 7H9 broth (BD, Mississauga, ON, Canada) supplemented with 10% ADC (8.1g/l NaCl, 50g/l  
440 BSA Fraction V (Millipore Sigma, Billerica, MA, USA), 20g/l glucose), 0.2% glycerol and  
441 0.05% Tween 80, or on Middlebrook 7H11 agar (BD) supplemented with 10% OADC  
442 enrichment (as per ADC plus 0.6ml/l oleic acid, 3.6mM NaOH). The BCG-Danish strain used in  
443 these experiments was transformed with an empty pMV361(hygromycin<sup>R</sup>) plasmid and was  
444 initially selected in the presence of 50µg/ml hygromycin (Wisent, Saint-Jean-Baptiste, QC,  
445 Canada). This plasmid was integrated into the non-essential L5 phage attachment site (*attB*)  
446 located within the BCG chromosome. We termed this strain BCG(e).

447

448 **Preparation of *M. bovis* BCG-Danish cultures for mouse immunization**

449 100 ml BCG cultures were grown in 7H9/ADC medium to an OD<sub>600nm</sub> = 0.6. After spinning at  
450 3000 rpm, cells were washed twice with PBS containing 0.05% Tween-80 (PBS-Tw) and  
451 resuspended in 6 ml of this buffer. After passing 10 times through a 22G x1” and 10 times  
452 through a 27G x1/2” needle, the suspension was mixed with 4 ml of sterile 50% glycerol in PBS.  
453 Aliquots were made and frozen at -80<sup>0</sup>C. Prior to immunization, an aliquot was thawed, and 10-  
454 fold serial dilutions were plated on 7H11/OADC+ HYG for quantification, yielding a value of  
455 ~1.5 x10<sup>8</sup> cfu/ml. On the day of the immunization, these glycerol stocks were diluted (1/20) in  
456 PBS-Tw and 200 ul (containing ~ 1.5 x10<sup>6</sup> cfu) were injected i.p. into the lower right quadrant of  
457 the abdomen of the mice using a 28Gx1/2” needle and an insulin syringe. Inocula were  
458 quantified by plating 10-fold serial dilutions on 7H11/OADC+ HYG.

459

## 460 **Generation of Ad(Spike) vector**

461 The AdSpike construct was developed following a similar protocol as described<sup>62</sup>. Briefly, the  
462 Spike gene cassette combined a Kozak sequence with the full length of the Spike protein  
463 (Genbank accession number QHU36824.1), codon optimized to mouse and human expression  
464 avoiding restriction sites Bgl2, Pac1, and Pme1, followed by a Kpn1 restriction site and the poly-  
465 A signal  
466 “TCTAGACTCGACCTCTGGCTAATAAAGGAAATTTATTTTCATTGCAATAGTGTGTTG  
467 GAATTTTTTGTGTCTCTCACTCGGAAGGACATATGGGAGGGCAAATCATTGCGGCC  
468 GCGATATC” (GenScript, Piscataway, NJ, USA). The gene cassette was flanked by Bgl2 sites  
469 and synthesized by Integrated DNA Technologies (Coralville, IA, USA) then cloned into the  
470 vector, pShuttle-CMV-Cuo<sup>63</sup>. Primers to confirm gene sequence can be found in Supplemental  
471 Table 3. The plasmid containing our recombinant non-replicating human adenovirus serotype 5  
472 (E1 and E3 genes removed ( $\Delta$ E1-,  $\Delta$ E3-); 1<sup>st</sup> generation) encoding the S-protein gene was made  
473 through homologous recombination in AdEasier-1 cells (strain), a gift from Dr. Bert Vogelstein  
474 (Addgene plasmid #16399) (Addgene, Watertown, MA, USA)<sup>64</sup>. It was then linearized with  
475 *PacI* and transfected into HEK293A cells (RRID:CVCL\_6910). Our recombinant adenovirus  
476 was then amplified using SF-BMAd-R cells<sup>61</sup> in 3 batches (Ad(Spike) 1-3), combined, and  
477 purified by ultracentrifugation on CsCl gradients as described previously<sup>65</sup>, before titration using  
478 a TCID<sub>50</sub> assay. A second human adenovirus serotype 5 ( $\Delta$ E1-,  $\Delta$ E3-; 1<sup>st</sup> generation), lacking a  
479 gene cassette, was used as a negative control.

480

## 481 **Western blot assays**

482 To determine protein expression by Ad(Spike), cell lysates of Ad(Spike) infected HEK293A  
483 cells were assessed. Briefly, cells were infected at a multiplicity of infection of 5 particles per  
484 cell and incubated for 48-72 hours, pelleted, and then lysed (0.1M Tris, 10  $\mu$ L EGTA, 50  $\mu$ L  
485 Triton-100, 0.1M NaCl, 1mM EDTA, 25  $\mu$ L 10% NaDeoxycholate, 1X protease inhibitor, in  
486 ddH<sub>2</sub>O). Cell lysates were then resolved on an SDS-PAGE gel under reducing conditions  
487 followed by transfer onto a nitrocellulose membrane. The membrane was subsequently blocked  
488 in phosphate buffered saline (PBS) with 0.05% Tween 20 (PBS-T) and 5% milk (Smucker Foods  
489 of Canada Corp, Markham, ON, Canada) (PBS-TM). The membrane was then incubated with  
490 rabbit anti-SARS-CoV-2 Covid-19 Spike RBD coronavirus polyclonal antibody  
491 (RRID:AB\_258251) diluted 1:5,000 in PBS-TM overnight at 4°C. The membrane was then  
492 washed in PBS-T before incubation with horseradish peroxidase (HRP)-conjugated anti-rabbit  
493 IgG (IgG-HRP) (Rockland Immunochemicals, Pottstown, PA, USA) diluted 1:10,000 in PBS-T  
494 for one hour at room temperature. After incubation the membrane was washed again and  
495 developed using SuperSignal West Pico Plus Chemiluminescent Substrate (ThermoFisher  
496 Scientific, Waltham, MA, USA).

497

#### 498 **Protein expression and purification**

499 SARS-CoV-2 Spike variants Wuhan, B.1.1.7 (alpha), B.1.351 (beta), P.1 (gamma), B.1.617.2  
500 (delta), B.1.1.529 (omicron), and the RBD portion of the Wuhan Spike variant were obtained  
501 from the National Research Council of Canada. Recombinant, “tagless” Spike proteins were  
502 produced as previously described<sup>66</sup>. Recombinant RBD protein was produced as previously  
503 described<sup>67,68</sup>. Spike variant BA.2 (omicron) was obtained through BEI Resources, NIAID, NIH:

504 Spike Glycoprotein (Stabilized) from SARS-Related Coronavirus 2, BA.2 Lineage (Omicron  
505 Variant) with C-Terminal Histidine and Avi Tags, Recombinant from HEK293 Cells, NR-56517.

506

### 507 **Immunization and challenge protocol in mice**

508 Six- to eight-week-old female C57BL/6 mice were ordered from Charles River Laboratories  
509 (RRID:IMSR\_CRL:027) (Senneville, QC, Canada). Each mouse was immunized at weeks 0 and  
510 4 by intraperitoneal (i.p.) injection of 200 $\mu$ L of BCG(e) and i.n. administration of 30 $\mu$ L of  
511 adenovirus formulations, respectively. Group 2 was removed from the long-term challenge  
512 experiment since negative control animals displayed similar viremia to the PBS control in the  
513 short-term challenge model. See Table 1 for more precise group descriptions. Mice were bled  
514 from the saphenous vein at weeks 0, 4, 8, 12, and 18. Mice immunized for humoral and cell-  
515 mediated immunity assessment (n=6) were euthanized 6 months after the final immunization and  
516 blood, spleens, and lungs were collected. Mice immunized for challenge studies (n=12) were  
517 transferred to the University of Toronto and challenged with 10<sup>6</sup> TCID<sub>50</sub> of SARS-CoV-2 South  
518 African strain (B.1.351) 2 (n=6) or 6 months (n=6) post-Ad(Spike)-vaccination. TCID<sub>50</sub> was  
519 determined using the Spearman–Kärber method<sup>69</sup>. Oral swabs were taken from mice on days 1,  
520 3, and 5 post-challenge in DMEM. Mice were euthanized 5 days after challenge and lungs were  
521 collected.

522

### 523 **Quantification of viral load**

524 Quantities of infectious virus was determined by determining the median tissue-culture  
525 infectivity dose (TCID<sub>50</sub>) using methods that have been described previously<sup>70</sup>. Briefly, Vero E6  
526 cells were seeded into plates and incubated overnight at 37°C. On the following day, media was

527 removed, and samples were added and serially diluted using ten-fold dilutions. Plates were  
528 incubated at 37°C for 1 h. After incubation, the media was removed and replaced with complete  
529 DMEM, and plates were incubated at 37°C for 5 days. Cells were examined for cytopathic effect  
530 (CPE) at 5 dpi. TCID<sub>50</sub> was defined using the Spearman–Kärber method<sup>69</sup>.

531

### 532 **qRT-PCR**

533 Viral RNA loads were calculated as previously described<sup>70</sup>. Briefly, viral RNA was extracted  
534 using the QIAamp viral RNA kit (Qiagen, Hilden, Germany) according to the manufacturer's  
535 guidelines. SARS-CoV-2 viral RNA detection and quantification was performed using the Luna  
536 Universal Probe One-Step RT-qPCR kit (New England Biolabs, Whitby, ON, Canada) on the  
537 Rotor-gene Q platform (Qiagen). For quantification, standard curves were generated using a  
538 synthetic plasmid containing a segment of the E-gene (GenScript) and interpolation was  
539 performed as described by Feld et al.<sup>71</sup>. The limit of quantification was determined to be 20  
540 copies/mL.

541

### 542 **Spike and RBD-specific IgG, IgG1, IgG2c, IgA quantification and IgG avidity assays**

543 Briefly, high binding 96-well plates (Greiner Bio-One, Frickenhausen, Germany) were coated  
544 with recombinant Spike or RBD (0.5 µg/mL) in 100 mM bicarbonate/carbonate buffer (pH 9.6)  
545 along with various standard curves (IgG, IgG1, IgG2c, IgA: serially diluted from 2000 ng/mL to  
546 1.953 ng/mL) overnight at 4°C. Then, plates were blocked with 2% bovine serum albumin (BSA;  
547 Sigma Aldrich, St. Louis, MO, USA) in PBS-T (blocking buffer) for 1 hour at 37°C before  
548 samples diluted in blocking buffer were added in duplicate. Nasal wash samples were run in  
549 singlet. When running serum for total Spike/RBD-IgG, an additional set of serum samples was



550 run to determine IgG avidity. Plates were incubated for 1 hour at 37°C then washed with PBS  
551 (pH 7.4). For IgG avidity assessment, the additional set of samples received 8M urea, while  
552 blocking buffer was added to the first set and the standard curve. Plates were covered and  
553 incubated for 15 minutes at room temperature protected from light, washed 4 times, and then  
554 blocked again with blocking buffer for 1 hour at 37°C. Next, plates were washed with PBS and  
555 anti-mouse IgG-HRP (Sigma Aldrich) was diluted 1:20,000 in blocking buffer and applied for 30  
556 minutes at 37°C. For other immunoglobulins, the same protocol was followed without the  
557 additional avidity steps and the appropriate HRP-conjugated antibody was applied. Both IgG1-  
558 and IgG2c-HRP were diluted 1:20,000 in blocking buffer and applied for 30 minutes at 37°C.  
559 For IgA, HRP-conjugated anti-mouse IgA (Sigma Aldrich) was diluted 1:2,000 in blocking  
560 buffer and applied for 1 hour at 37°C. Plates were washed a final time with PBS and 3,3',5,5'-  
561 Tetramethyl benzidine (TMB) substrate (Sigma Aldrich) was added to each well. The reaction  
562 was stopped after 15 minutes using H<sub>2</sub>SO<sub>4</sub> (0.5M; Fisher Scientific, Waltham, MA, USA) and  
563 the optical density (OD) was measured at 450 nm with an EL800 microplate reader (BioTek  
564 Instruments Inc., Winooski, VT, USA). Concentrations of Spike/RBD specific antibodies were  
565 calculated by extrapolation from respective standard curves and multiplied by the dilution factor.  
566 IgG avidity indices were calculated by dividing the IgG titre in the urea conditions by the IgG  
567 titre in the non-treated condition.

568

#### 569 **Surrogate virus neutralization test:**

570 Neutralizing antibodies were assessed using the cPass SARS-CoV-2 Neutralization Antibody  
571 Detection Kit (GenScript) according to manufacturer's instructions with the following changes:  
572 To collect semi-quantitative results, the kit was run with the SARS-CoV-2 Neutralizing

573 Antibody Calibrator to create a standard curve used to determine the concentration of  
574 neutralizing antibodies. BALF samples were run neat or diluted (1:3) and serum samples were  
575 diluted (1:150). Samples that gave values above the 30% signal inhibition cut-off value were  
576 multiplied by the dilution factor and reported as Units/mL. Data reported according to the  
577 manufacturer's guidelines can be found in Supplemental Tables 4 (serum) and 5 (BALF).

578

### 579 **BALF and lung collection**

580 Six months after the last immunization, unchallenged mice were euthanized and the lungs were  
581 collected. Bronchoalveolar lavage fluid (BALF) was collected by combining four lung washes of  
582 0.5mL of cold PBS+protease inhibitor. Lungs were collected in 1mL cold RPMI. Lungs were  
583 digested enzymatically for 30 minutes at 37°C and 5% CO<sub>2</sub> with a cocktail of DNase I (200  
584 µg/mL, Sigma Aldrich), Liberase<sup>TM</sup> (100 µg/mL, Roche, Indianapolis, IN, USA), hyaluronidase  
585 1a (1 mg/mL, Life Technologies, Carlsbad, CA, USA), and collagenase XI (250µg/ml; Life  
586 Technologies) in RPMI-1640 as described previously<sup>72</sup>. Cells were then washed with RPMI-  
587 1640 media containing 1% Penicillin/Streptomycin and 5% FBS. Sterile, filtered ammonium-  
588 chloride-potassium (ACK) buffer was used to lyse red blood cells. Filtration through a 0.7 µM  
589 strainer was performed and the remaining viable cells were recovered.

590

### 591 **Quantification of cytokine-secretion in T cells by multi-parametric flow cytometry**

592 Lung lymphocytes were seeded into 96-well flat bottom plates (BD) at 10<sup>6</sup> cells in 200 uL/well.  
593 Duplicate cultures were stimulated with or without a combined preparation of Peptivator Peptide  
594 Pools of the complete Spike protein and predicted immunodominant sequences (Miltenyi Biotec,  
595 Bergisch Gladbach, North Rhine-Westphalia, Germany) in RPMI (0.3 µg/mL final

596 concentration) for 18 and 96 hours at 37°C + 5% CO<sub>2</sub>. For the last 6 hours of incubation, protein  
597 transport inhibitor was prepared according to the manufacturer's guidelines  
598 (RRID:AB\_2869014, BD Science, San Jose, CA, USA) and added to all samples. Cells  
599 stimulated with phorbol 12-myristate 13-acetate (Thermofisher Scientific) and ionomycin  
600 (Thermofisher Scientific) were processed as positive controls. All staining and fixation steps  
601 took place at 4°C protected from light. Briefly, the cells were washed twice with cold PBS and  
602 stained with 50µL/well fixable viability dye eFluor 780 (Thermofisher Scientific) diluted at  
603 1:1000 for 20 minutes. Cells were washed once with PBS. All surface stains were diluted 1:50 in  
604 PBS and 50µL/well of extracellular cocktail was applied for 30 minutes. The following  
605 antibodies made up the extracellular cocktail: CD3-BUV395 (145-2C11, RRID: AB\_27382, BD  
606 Biosciences, Franklin Lakes, NJ, USA), CD4-AF700 (RM4-5, RRID: AB\_49370, BioLegend,  
607 San Diego, CA, USA), CD8b-BV510 (H35-17.2, RRID: AB\_2739908, BD Biosciences) and  
608 CD69-FITC (H1.2F3, RRID: AB\_313108, BioLegend). Cells were then washed as before and  
609 fixed with the eBioscience FoxP3 transcription factor staining buffer (Thermofisher Scientific)  
610 overnight. The next day, plates were washed with 1X permeabilization buffer (perm buffer)  
611 (Thermofisher Scientific) and stained with an intracellular cocktail of antibodies diluted 1:50 in  
612 perm buffer applied as 50µL/well for 30 minutes. The intracellular cocktail was made up of:  
613 FOXP3-Pe-Cy7 (FJK-16s, RRID: AB\_891552, Thermofisher Scientific), IFN $\gamma$ -BUV737  
614 (XMG1.2, RRID: AB\_2870098, BD Biosciences), IL-17A-APC (TC11-18H10.1, RRID:  
615 AB\_536018, BioLegend), IL-4-BV421 (11B11, RRID: AB\_2562594, BioLegend), GrB-PE  
616 (QA1602, RRID: AB\_2687032, BioLegend), and TNF $\alpha$ -PerCP-Cy5.5 (MP6-XT22, RRID:  
617 AB\_961434, BioLegend). After staining, cells were washed twice with perm buffer and  
618 resuspended in PBS 1X and acquired on a BD LSRFortessa X-20 (BD Science). Flow data were

619 analysed using FlowJo software (version 10.0.8r1) (Treestar, Ashland, OR, USA). Our gating  
620 strategy is shown in Supplemental Figure 5.

621

## 622 **Histological analysis**

623 Organs collected from the challenged animals at the time of necropsy were placed in 10%  
624 phosphate-buffered formalin. Collected tissues were subsequently processed for histopathology,  
625 and slides were stained with haematoxylin and eosin (H & E), to assess tissue architecture and  
626 inflammation, and Masson's trichrome, to determine the progression of fibrosis. Sections of  
627 lungs were examined and scored by a pathologist who was blinded to the experimental groups.  
628 Lungs were evaluated for fibrosis, the presence or absence of features of cell or tissue damage  
629 (CTD: necrosis of bronchiolar epithelial cells (BEC), inflammatory cells and/or cellular debris in  
630 bronchi, intraepithelial neutrophils, alveolar emphysema), circulatory changes and vascular  
631 lesions (CVL: alveolar hemorrhage, significant alveolar edema, vasculitis/vascular  
632 endothelialitis), reactive inflammatory patterns (RIP: necrosuppurative bronchitis, intraalveolar  
633 neutrophils, and macrophages, mononuclear infiltrates around airways, presence of  
634 polymorphonuclear granulocytes, perivascular mononuclear cuffs, and mesothelial reactivity), as  
635 well as regeneration and repair (RR: alveolar epithelial hyperplasia/regeneration, BEC  
636 hyperplasia/regeneration) as described elsewhere<sup>70,73</sup>. After the scoring was completed, lung  
637 pathology scores were tabulated. Processed and stained lung slides were digitized using Aperio  
638 AT2 (Leica Biosystems, Wetzlar, Germany).

639

## 640 **Statistical analysis**

641 Statistical analysis was performed using GraphPad Prism 9 software (La Jolla, CA, USA). Data  
642 were assessed for normality using Shapiro-Wilk tests. Non-parametric data were analysed by  
643 Kruskal-Wallis tests with Dunn's multiple comparisons. When appropriate, one-way and two-  
644 way ANOVAs were employed with Tukey's multiple comparisons. P values <0.05 were  
645 considered significant.

646

### 647 **List of supplementary materials**

648 Figures S1 to S6

649 Tables S1 to S5

650 ARRIVE Checklist

651 MDAR Reproducibility Checklist

652

### 653 **References**

- 654 1. WHO Coronavirus (COVID-19) Dashboard | WHO Coronavirus (COVID-19) Dashboard  
655 With Vaccination Data. <https://covid19.who.int/>.
- 656 2. Zhu, N. *et al.* A Novel Coronavirus from Patients with Pneumonia in China, 2019. *N.*  
657 *Engl. J. Med.* **382**, 727–733 (2020).
- 658 3. Al-Aly, Z., Bowe, B. & Xie, Y. Long COVID after breakthrough SARS-CoV-2 infection.  
659 *Nat. Med.* 2022 287 **28**, 1461–1467 (2022).
- 660 4. Zheng, C. *et al.* Real-world effectiveness of COVID-19 vaccines: a literature review and  
661 meta-analysis. *Int. J. Infect. Dis.* **114**, 252–260 (2022).
- 662 5. Eyre, D. W. *et al.* Effect of Covid-19 Vaccination on Transmission of Alpha and Delta  
663 Variants. *N. Engl. J. Med.* **386**, 744–756 (2022).

- 664 6. Feikin, D. R. *et al.* Duration of effectiveness of vaccines against SARS-CoV-2 infection  
665 and COVID-19 disease: results of a systematic review and meta-regression. *Lancet*  
666 (*London, England*) **399**, 924–944 (2022).
- 667 7. Brosh-Nissimov, T. *et al.* BNT162b2 vaccine breakthrough: clinical characteristics of 152  
668 fully vaccinated hospitalized COVID-19 patients in Israel. *Clin. Microbiol. Infect.* **27**,  
669 1652–1657 (2021).
- 670 8. Goldberg, Y. *et al.* Waning Immunity after the BNT162b2 Vaccine in Israel. *N. Engl. J.*  
671 *Med.* **385**, e85 (2021).
- 672 9. Ferdinands, J. M. *et al.* Waning 2-Dose and 3-Dose Effectiveness of mRNA Vaccines  
673 Against COVID-19-Associated Emergency Department and Urgent Care Encounters and  
674 Hospitalizations Among Adults During Periods of Delta and Omicron Variant  
675 Predominance - VISION Network, 10 States, August 2021-January 2022. *MMWR. Morb.*  
676 *Mortal. Wkly. Rep.* **71**, 255–263 (2022).
- 677 10. Moss, P. The T cell immune response against SARS-CoV-2. *Nat. Immunol.* **23**, 186–193  
678 (2022).
- 679 11. McCafferty, S. *et al.* A dual-antigen self-amplifying RNA SARS-CoV-2 vaccine induces  
680 potent humoral and cellular immune responses and protects against SARS-CoV-2 variants  
681 through T cell-mediated immunity. *Mol. Ther.* (2022)  
682 doi:10.1016/J.YMTHE.2022.04.014.
- 683 12. Travis, C. R. As Plain as the Nose on Your Face: The Case for A Nasal (Mucosal) Route  
684 of Vaccine Administration for Covid-19 Disease Prevention. *Front. Immunol.* **11**, (2020).
- 685 13. Dhama, K. *et al.* COVID-19 intranasal vaccines: current progress, advantages, prospects,  
686 and challenges. *Hum. Vaccin. Immunother.* **18**, (2022).

- 687 14. Hassan, A. O. *et al.* A Single-Dose Intranasal ChAd Vaccine Protects Upper and Lower  
688 Respiratory Tracts against SARS-CoV-2. *Cell* **183**, 169-184.e13 (2020).
- 689 15. Hassan, A. O. *et al.* A single intranasal dose of chimpanzee adenovirus-vectored vaccine  
690 protects against SARS-CoV-2 infection in rhesus macaques. *Cell Reports Med.* **2**, (2021).
- 691 16. Madhavan, M. *et al.* Tolerability and immunogenicity of an intranasally-administered  
692 adenovirus-vectored COVID-19 vaccine: An open-label partially-randomised ascending  
693 dose phase I trial. *EBioMedicine* **85**, (2022).
- 694 17. Martinez, L. *et al.* Infant BCG vaccination and risk of pulmonary and extrapulmonary  
695 tuberculosis throughout the life course: a systematic review and individual participant data  
696 meta-analysis. *Lancet. Glob. Heal.* **10**, e1307–e1316 (2022).
- 697 18. Roth, A. *et al.* BCG vaccination scar associated with better childhood survival in Guinea-  
698 Bissau. *Int. J. Epidemiol.* **34**, 540–547 (2005).
- 699 19. Stensballe, L. G. *et al.* Acute lower respiratory tract infections and respiratory syncytial  
700 virus in infants in Guinea-Bissau: a beneficial effect of BCG vaccination for girls:  
701 Community based case–control study. *Vaccine* **23**, 1251–1257 (2005).
- 702 20. Netea, M. G., Quintin, J. & Van Der Meer, J. W. M. Trained immunity: A memory for  
703 innate host defense. *Cell Host Microbe* **9**, 355–361 (2011).
- 704 21. Moorlag, S. J. C. F. M., Arts, R. J. W., van Crevel, R. & Netea, M. G. Non-specific effects  
705 of BCG vaccine on viral infections. *Clin. Microbiol. Infect.* **25**, 1473–1478 (2019).
- 706 22. O’Neill, L. A. J. & Netea, M. G. BCG-induced trained immunity: can it offer protection  
707 against COVID-19? *Nat. Rev. Immunol.* 2020 206 **20**, 335–337 (2020).
- 708 23. Kaufmann, E. *et al.* BCG vaccination provides protection against IAV but not SARS-  
709 CoV-2. *Cell Rep.* **38**, (2022).

- 710 24. Messina, N. L. *et al.* Off-target effects of bacillus Calmette–Guérin vaccination on  
711 immune responses to SARS-CoV-2: implications for protection against severe COVID-19.  
712 *Clin. Transl. Immunol.* **11**, e1387 (2022).
- 713 25. Rakshit, S. *et al.* Evidence for the heterologous benefits of prior BCG vaccination on  
714 COVISHIELD™ vaccine-induced immune responses in SARS-CoV-2 seronegative  
715 young Indian adults. *Front. Immunol.* **13**, 5362 (2022).
- 716 26. Van Doremalen, N. *et al.* Intranasal ChAdOx1 nCoV-19/AZD1222 vaccination reduces  
717 viral shedding after SARS-CoV-2 D614G challenge in preclinical models. *Sci. Transl.*  
718 *Med.* **13**, (2021).
- 719 27. Ledesma, J. R. *et al.* Spurious early ecological association suggesting BCG vaccination  
720 effectiveness for COVID-19. *PLoS One* **17**, e0274900 (2022).
- 721 28. Counoupas, C. *et al.* A single dose, BCG-adjuvanted COVID-19 vaccine provides  
722 sterilising immunity against SARS-CoV-2 infection. *npj Vaccines* 2021 61 **6**, 1–10 (2021).
- 723 29. Bannister, S. *et al.* Neonatal BCG vaccination is associated with a long-term DNA  
724 methylation signature in circulating monocytes. *Sci. Adv.* **8**, (2022).
- 725 30. Jackson, S. W. *et al.* B cell IFN- $\gamma$  receptor signaling promotes autoimmune germinal  
726 centers via cell-intrinsic induction of BCL-6. *J. Exp. Med.* **213**, 733–750 (2016).
- 727 31. Wirsching, S. *et al.* Long-Term, CD4+ Memory T Cell Response to SARS-CoV-2. *Front.*  
728 *Immunol.* **13**, (2022).
- 729 32. He, X. *et al.* Low-dose Ad26.COV2.S protection against SARS-CoV-2 challenge in  
730 rhesus macaques. *Cell* **184**, 3467-3473.e11 (2021).
- 731 33. Arts, R. J. W. *et al.* BCG Vaccination Protects against Experimental Viral Infection in  
732 Humans through the Induction of Cytokines Associated with Trained Immunity. *Cell Host*



- 733 *Microbe* **23**, 89-100.e5 (2018).
- 734 34. Covián, C. *et al.* BCG-Induced Cross-Protection and Development of Trained Immunity:  
735 Implication for Vaccine Design. *Front. Immunol.* **10**, 2806 (2019).
- 736 35. Peng, Q. *et al.* Waning immune responses against SARS-CoV-2 variants of concern  
737 among vaccinees in Hong Kong. *eBioMedicine* **77**, (2022).
- 738 36. Altmann, D. M. & Boyton, R. J. Waning immunity to SARS-CoV-2: implications for  
739 vaccine booster strategies. *Lancet. Respir. Med.* **9**, 1356 (2021).
- 740 37. Tiboni, M., Casettari, L. & Illum, L. Nasal vaccination against SARS-CoV-2: Synergistic  
741 or alternative to intramuscular vaccines? *Int. J. Pharm.* **603**, (2021).
- 742 38. Hassan, A. O. *et al.* An intranasal vaccine durably protects against SARS-CoV-2 variants  
743 in mice. *Cell Rep.* **36**, (2021).
- 744 39. Afkhami, S. *et al.* Respiratory mucosal delivery of next-generation COVID-19 vaccine  
745 provides robust protection against both ancestral and variant strains of SARS-CoV-2. *Cell*  
746 **185**, 896 (2022).
- 747 40. Kong, L. *et al.* Single-cell transcriptomic profiles reveal changes associated with BCG-  
748 induced trained immunity and protective effects in circulating monocytes. *Cell Rep.* **37**,  
749 (2021).
- 750 41. Arts, R. J. W. *et al.* BCG Vaccination Protects against Experimental Viral Infection in  
751 Humans through the Induction of Cytokines Associated with Trained Immunity. *Cell Host*  
752 *Microbe* **23**, 89-100.e5 (2018).
- 753 42. Kaufmann, E. *et al.* BCG Educates Hematopoietic Stem Cells to Generate Protective  
754 Innate Immunity against Tuberculosis. *Cell* **172**, 176-190.e19 (2018).
- 755 43. Walk, J. *et al.* Outcomes of controlled human malaria infection after BCG vaccination.

- 756 *Nat. Commun.* 2019 101 **10**, 1–8 (2019).
- 757 44. Singh, A. K., Netea, M. G. & Bishai, W. R. BCG turns 100: its nontraditional uses against  
758 viruses, cancer, and immunologic diseases. *J. Clin. Invest.* **131**, (2021).
- 759 45. Kleinnijenhuis, J. *et al.* Bacille Calmette-Guerin induces NOD2-dependent nonspecific  
760 protection from reinfection via epigenetic reprogramming of monocytes. *Proc. Natl. Acad.*  
761 *Sci. U. S. A.* **109**, 17537–17542 (2012).
- 762 46. Libraty, D. H. *et al.* Neonatal BCG vaccination is associated with enhanced T-helper 1  
763 immune responses to heterologous infant vaccines. *Trials Vaccinol.* **3**, 1–5 (2014).
- 764 47. Ota, M. O. C. *et al.* Influence of *Mycobacterium bovis* bacillus Calmette-Guérin on  
765 antibody and cytokine responses to human neonatal vaccination. *J. Immunol.* **168**, 919–  
766 925 (2002).
- 767 48. Leentjens, J. *et al.* BCG Vaccination Enhances the Immunogenicity of Subsequent  
768 Influenza Vaccination in Healthy Volunteers: A Randomized, Placebo-Controlled Pilot  
769 Study. *J. Infect. Dis.* **212**, 1930–1938 (2015).
- 770 49. Dubé, J. Y. *et al.* Synthetic mycobacterial molecular patterns partially complete Freund’s  
771 adjuvant. *Sci. Reports 2020 101* **10**, 1–14 (2020).
- 772 50. Nieuwenhuizen, N. E. & Kaufmann, S. H. E. Next-generation vaccines based on Bacille  
773 Calmette-Guérin. *Front. Immunol.* **9**, 121 (2018).
- 774 51. Mouhoub, E., Domenech, P., Ndao, M. & Reed, M. B. The Diverse Applications of  
775 Recombinant BCG-Based Vaccines to Target Infectious Diseases Other Than  
776 Tuberculosis: An Overview. *Front. Microbiol.* **12**, 3199 (2021).
- 777 52. Escobar, L. E., Molina-Cruz, A. & Barillas-Mury, C. BCG vaccine protection from severe  
778 coronavirus disease 2019 (COVID-19). *Proc. Natl. Acad. Sci. U. S. A.* **117**, 17720–17726

- 779 (2020).
- 780 53. Arlehamn, C. S. L., Sette, A. & Peters, B. Lack of evidence for BCG vaccine protection  
781 from severe COVID-19. *Proc. Natl. Acad. Sci. U. S. A.* **117**, 25203–25204 (2020).
- 782 54. Yao, Y. *et al.* Induction of Autonomous Memory Alveolar Macrophages Requires T Cell  
783 Help and Is Critical to Trained Immunity. *Cell* **175**, 1634-1650.e17 (2018).
- 784 55. Jeljeli, M. *et al.* Trained immunity modulates inflammation-induced fibrosis. *Nat.*  
785 *Commun.* 2019 101 **10**, 1–15 (2019).
- 786 56. Woodworth, J. S. *et al.* A Mycobacterium tuberculosis-specific subunit vaccine that  
787 provides synergistic immunity upon co-administration with Bacillus Calmette-Guérin.  
788 *Nat. Commun.* 2021 121 **12**, 1–13 (2021).
- 789 57. Rakshit, S. *et al.* BCG revaccination boosts adaptive polyfunctional Th1/Th17 and innate  
790 effectors in IGRA+ and IGRA- Indian adults. *JCI insight* **4**, (2019).
- 791 58. Pan, T. *et al.* Infection of wild-type mice by SARS-CoV-2 B.1.351 variant indicates a  
792 possible novel cross-species transmission route. *Signal Transduct. Target. Ther.* 2021 61  
793 **6**, 1–12 (2021).
- 794 59. Tauzin, A. *et al.* A C57BL/6 Mouse Model of SARS-CoV-2 Infection Recapitulates Age-  
795 and Sex-Based Differences in Human COVID-19 Disease and Recovery. *Vaccines* 2023,  
796 *Vol. 11, Page 47* **11**, 47 (2022).
- 797 60. Currey, J. M. *et al.* C57BL/6J Mice Are Not Suitable for Modeling Severe SARS-CoV-2  
798 Beta and Gamma Variant Infection. *Viruses* **14**, (2022).
- 799 61. Gilbert, R. *et al.* Establishment and validation of new complementing cells for production  
800 of E1-deleted adenovirus vectors in serum-free suspension culture. *J. Virol. Methods* **208**,  
801 177–188 (2014).

- 802 62. Perera, D. J. *et al.* A low dose adenovirus vectored vaccine expressing *Schistosoma*  
803 *mansoni* Cathepsin B protects from intestinal schistosomiasis in mice. *eBioMedicine* **80**,  
804 104036 (2022).
- 805 63. Mullick, A. *et al.* The cumate gene-switch: a system for regulated expression in  
806 mammalian cells. *BMC Biotechnol.* 2006 *61* **6**, 1–18 (2006).
- 807 64. He, T.-C. *et al.* A simplified system for generating recombinant adenoviruses. *Proc. Natl.*  
808 *Acad. Sci.* **95**, 2509–2514 (1998).
- 809 65. Mehdy Elahi, S., Nazemi-Moghaddam, N., Guilbault, C., Simoneau, M. & Gilbert, R.  
810 Complementary Cell Lines for Protease Gene-Deleted Single-Cycle Adenovirus Vectors.  
811 *Cells* 2023, *Vol. 12, Page 619* **12**, 619 (2023).
- 812 66. Akache, B. *et al.* Immunogenicity of SARS-CoV-2 spike antigens derived from Beta &  
813 Delta variants of concern. *npj Vaccines* 2022 *71* **7**, 1–7 (2022).
- 814 67. Colwill, K. *et al.* A scalable serology solution for profiling humoral immune responses to  
815 SARS-CoV-2 infection and vaccination. *Clin. Transl. Immunol.* **11**, e1380 (2022).
- 816 68. Forest-Nault, C. *et al.* Impact of the temperature on the interactions between common  
817 variants of the SARS-CoV-2 receptor binding domain and the human ACE2. *Sci. Reports*  
818 *2022 121* **12**, 1–11 (2022).
- 819 69. Reed, L. J. & Muench, H. A simple method of estimating fifty per cent endpoints. *Am. J.*  
820 *Epidemiol.* **27**, 493–497 (1938).
- 821 70. Babuadze, G. G. *et al.* Two DNA vaccines protect against severe disease and pathology  
822 due to SARS-CoV-2 in Syrian hamsters. *npj Vaccines* 2022 *71* **7**, 1–11 (2022).
- 823 71. Feld, J. J. *et al.* Peginterferon lambda for the treatment of outpatients with COVID-19: a  
824 phase 2, placebo-controlled randomised trial. *Lancet Respir. Med.* **9**, 498–510 (2021).

- 825 72. Nakada, E. M., Shan, J., Kinyanjui, M. W. & Fixman, E. D. Adjuvant-dependent  
826 regulation of interleukin-17 expressing  $\gamma\delta$  T cells and inhibition of Th2 responses in  
827 allergic airways disease. *Respir. Res.* **15**, 1–14 (2014).
- 828 73. Gruber, A. D. *et al.* Standardization of Reporting Criteria for Lung Pathology in SARS-  
829 CoV-2-infected Hamsters: What Matters? *Am. J. Respir. Cell Mol. Biol.* **63**, 856–859  
830 (2020).

831

### 832 **Acknowledgements:**

833 We would like to thank Annie Beauchamp, Rami Karkout, Sarah Santoso, Louis Cyr,  
834 Angela Brewer, and Raidan Alyazidi for their contributions during animal sacrifice and advice  
835 for experimental procedures as well as the other members of the Ward/Ndao laboratory for their  
836 support. We would also like to thank Dr. Marcel Behr for kindly providing us with the Danish  
837 strain of BCG. We would like to thank Heather Tyra and Francois Francoeur at IDT for their  
838 assistance in making our gene construct. We would like to thank Nazila Nazemi-Moghaddam  
839 and Claire Guilbault of the National Research Council of Canada for their support  
840 manufacturing, amplifying, and titrating our recombinant adenovirus. We thank the staff from  
841 the high-containment lab (Sunnybrook Hospital) for their technical assistance. We would like to  
842 thank the members of the Mammalian Cell Expression Section of the NRC-HHT for their  
843 contribution to producing and purifying the recombinant proteins and those members at BEI  
844 resources for their contributions of recombinant proteins. In addition, we would like to thank the  
845 Immunophenotyping Platform at the Research Institute of the McGill University Health Centre  
846 (RI-MUHC). We would like to thank Kim Babin and Bruce Lu, from Euroimmun and GenScript,  
847 respectively, with their help obtaining cPass neutralizing antibody kits. We would also like to

848 thank Ara Xiii for their help in editing our manuscript. Finally, we would like to thank all the  
849 entities which contributed to this work financially including the McGill Interdisciplinary  
850 Initiative in Infection and Immunity (MI4) program, the Foundation of the MUHC, the R.  
851 Howard Webster Foundation, the Foundation of the Montreal General Hospital, and the RI-  
852 MUHC.

853

#### 854 **Funding**

855 McGill Interdisciplinary Initiative in Infection and Immunity (MI4) Emergency COVID-19  
856 Research Funding Grant ECRF-R2-70 (MO, MBR, and MN)

857

#### 858 **Author contributions:**

859 Study design: DJP, PD, MBR, and M Ndao in collaboration with RK, GPK, and RG

860 Funding acquisition: M Ndao, MBR, MO

861 Vaccine design: DJP and PD with assistance from SME.

862 Animal vaccinations and immunogenicity experiments: DJP, CKP, PD

863 Animal sacrifice, sample collection, and sample processing: DJP, PD, FA, and LL

864 Histology imaging and scoring: AL and POF

865 Recombinant protein production: MS and YD

866 Manuscript preparation: DJP, FA

867 Manuscript editing and contribution: PD, GGB, M Naghibosodat, CAP, RK, MBR, M Ndao

868 Animal challenge experiments: M Naghibosadat, GGB, and RK

869 All authors have read and approved the final version of this manuscript.

870

871 **Competing interests:**

872 The authors declare that there are no competing interests involved in this work.

873

874 **Data and materials availability:**

875 All data associated with this study are present in the paper or the Supplementary Materials.

876 Requests may be made by contacting the corresponding author.

877

878

879

880 **Figures**

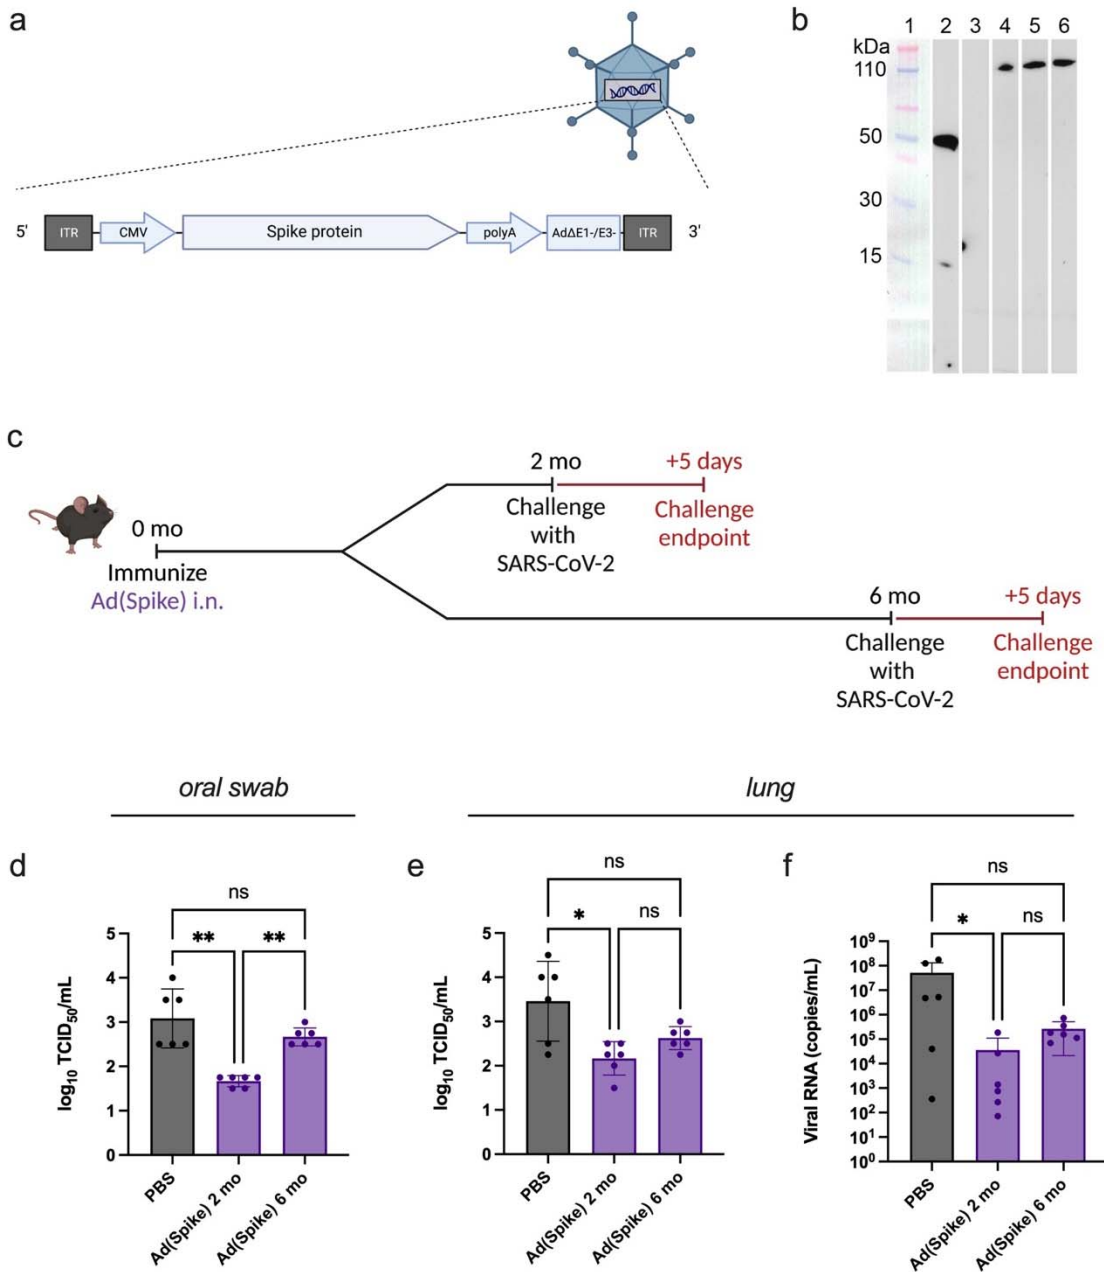

881

882

883 **Figure 1. The protection provided by a single dose of intranasal recombinant Ad(Spike)**

884 **attenuates with time in C57BL/6 mice.**

885 **(a)** Diagram of the SARS-CoV-2 Spike protein (ancestral strain) transgene cassette expressed in

886 **our recombinant ΔE1/E3 human adenovirus serotype 5, termed Ad(Spike). (b)** Western blot



887 analyses of antigen expression from SF-BMAd-R cells infected with Ad(Spike). Samples were  
888 run against a molecular weight ladder; lanes 1 and 2. The negative control contains SF-BMAd-R  
889 cells infected with a  $\Delta E1/E3$  adenovirus with an empty gene cassette, termed Ad(e); lane 3.  
890 Ad(Spike) was amplified in 3 batches of cells and western blots were run on cell lysates from  
891 each batch; lanes 4-6, before being combined and purified. This western blot was run with an  
892 RBD-specific antibody, thereby capturing the S1 portion. **(c)** Study design schematic. At time 0,  
893 animals were vaccinated intranasally (i.n.) with  $10^9$  mean tissue culture infectious dose (TCID<sub>50</sub>)  
894 of Ad(Spike) in 30  $\mu$ L. In the case of the sham control, at time 0 animals were vaccinated i.n.  
895 with 30  $\mu$ L PBS. Mice were then challenged with  $10^6$  TCID<sub>50</sub> SARS-CoV-2 South African strain  
896 (B.1.351) at month 2 or month 6 post-vaccination. In both challenge models, animals were  
897 followed for 5 days with nasal swab collection on day 3 and euthanasia on day 5. **(d)-(f)**  
898 Infectious viral load in mice challenged with the B.1.351 variant of SARS-CoV-2, 2- and 6-  
899 months post-immunization with Ad(Spike). Viral load (TCID<sub>50</sub>) in (d) oral swabs at 3 dpi, and  
900 (e) lungs at 5 dpi, quantified by the Spearman–Kärber method. Viral RNA in mouse (f) lungs at  
901 5 dpi. N=6. Data points represent individual mice, means  $\pm$  SD are shown. For (d)-(f), Kruskal-  
902 Wallis test with Dunn's multiple comparisons: \* $p < 0.05$ ; \*\* $p < 0.01$ ; ns = not significant.  
903 Schematics made with BioRender.com.

904

905

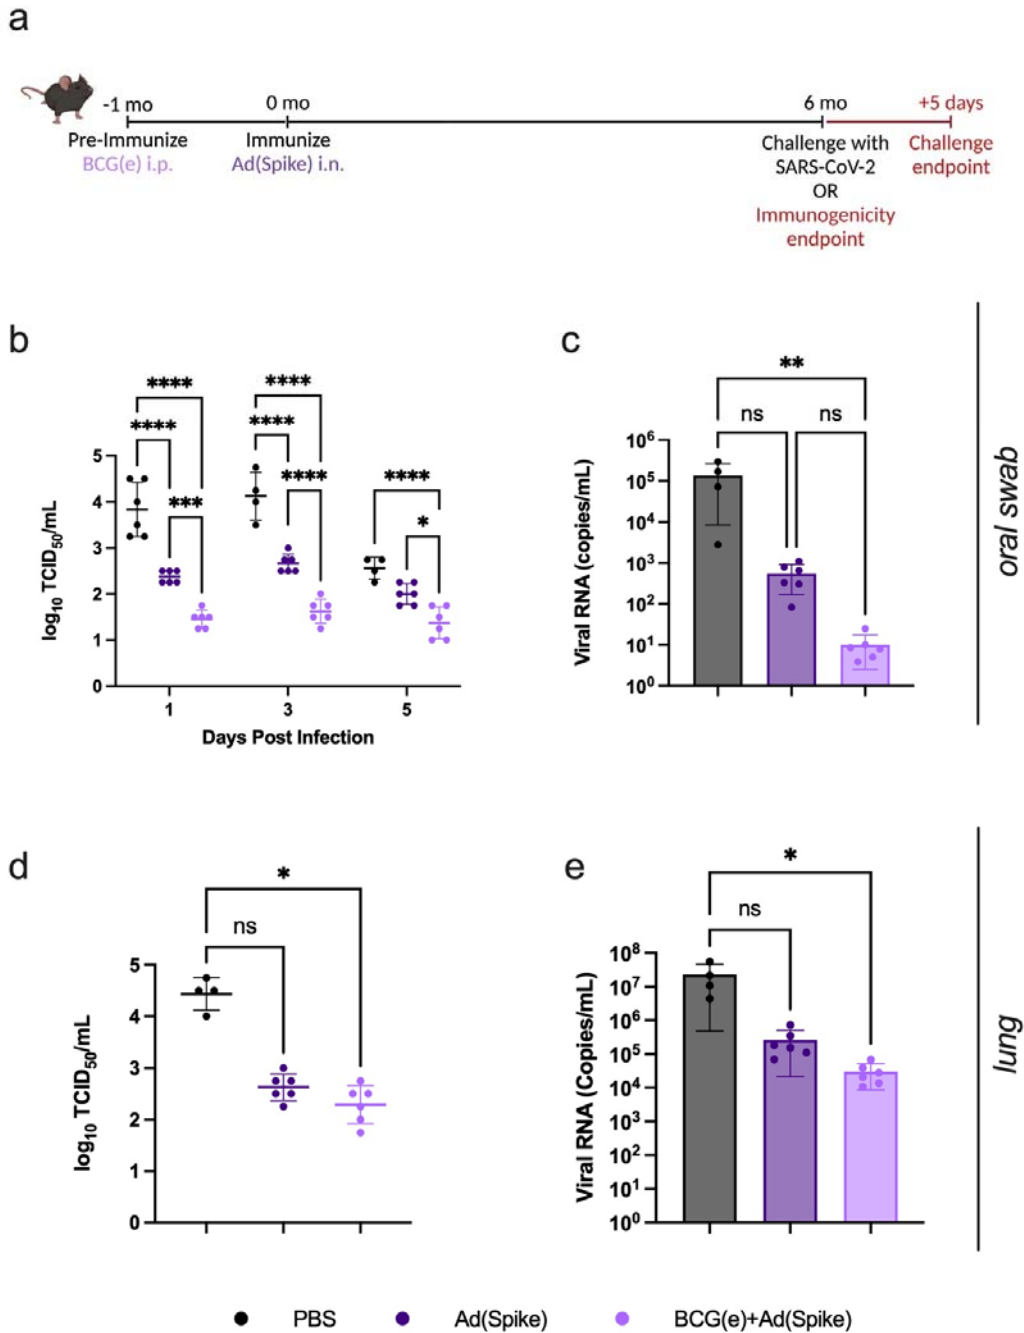

906

907 **Figure 2. Exposure to BCG prolongs the protective effect of Ad(Spike) in immunized**

908 **C57BL/6 mice.**

909 (a) Study design schematic. Animals were primed intraperitoneally (i.p.) with  $10^6$  cfu BCG

910 containing an empty gene cassette (BCG(e)) or PBS at time -1 month. At time 0, animals were

911 vaccinated intranasally (i.n.) with  $10^9$  mean tissue culture infectious dose (TCID<sub>50</sub>) of Ad(Spike)  
912 in 30 uL. In the case of the sham control, at time 0 animals were vaccinated i.n. with 30 uL PBS.  
913 Mice were then challenged with  $10^6$  TCID<sub>50</sub> SARS-CoV-2 South African strain (B.1.351) 6  
914 months post-vaccination. Animals were followed for 5 days post challenge, with nasal swabs  
915 collected on days 1, 3, and 5 post-infection and euthanasia on day 5.  
916 **(b)-(e)** Viral load quantified (b) in oral swabs at 1, 3, and 5 dpi, and (d) in lungs at 5 dpi,  
917 quantified by TCID<sub>50</sub>. Viral RNA in (c) oral swabs at 5 dpi and (e) lungs at 5 dpi. N=4-6. Data  
918 points represent individual mice, means  $\pm$  SD are shown. For (b), Two-way ANOVA with  
919 Tukey's multiple comparisons: \* $p < 0.05$ ; \*\*\* $p < 0.001$ ; \*\*\*\* $p < 0.0001$ . For (c)-(e), Kruskal-Wallis  
920 test with Dunn's multiple comparisons: \* $p < 0.05$ ; \*\* $p < 0.01$ ; ns = not significant. Schematic made  
921 with BioRender.com.  
922

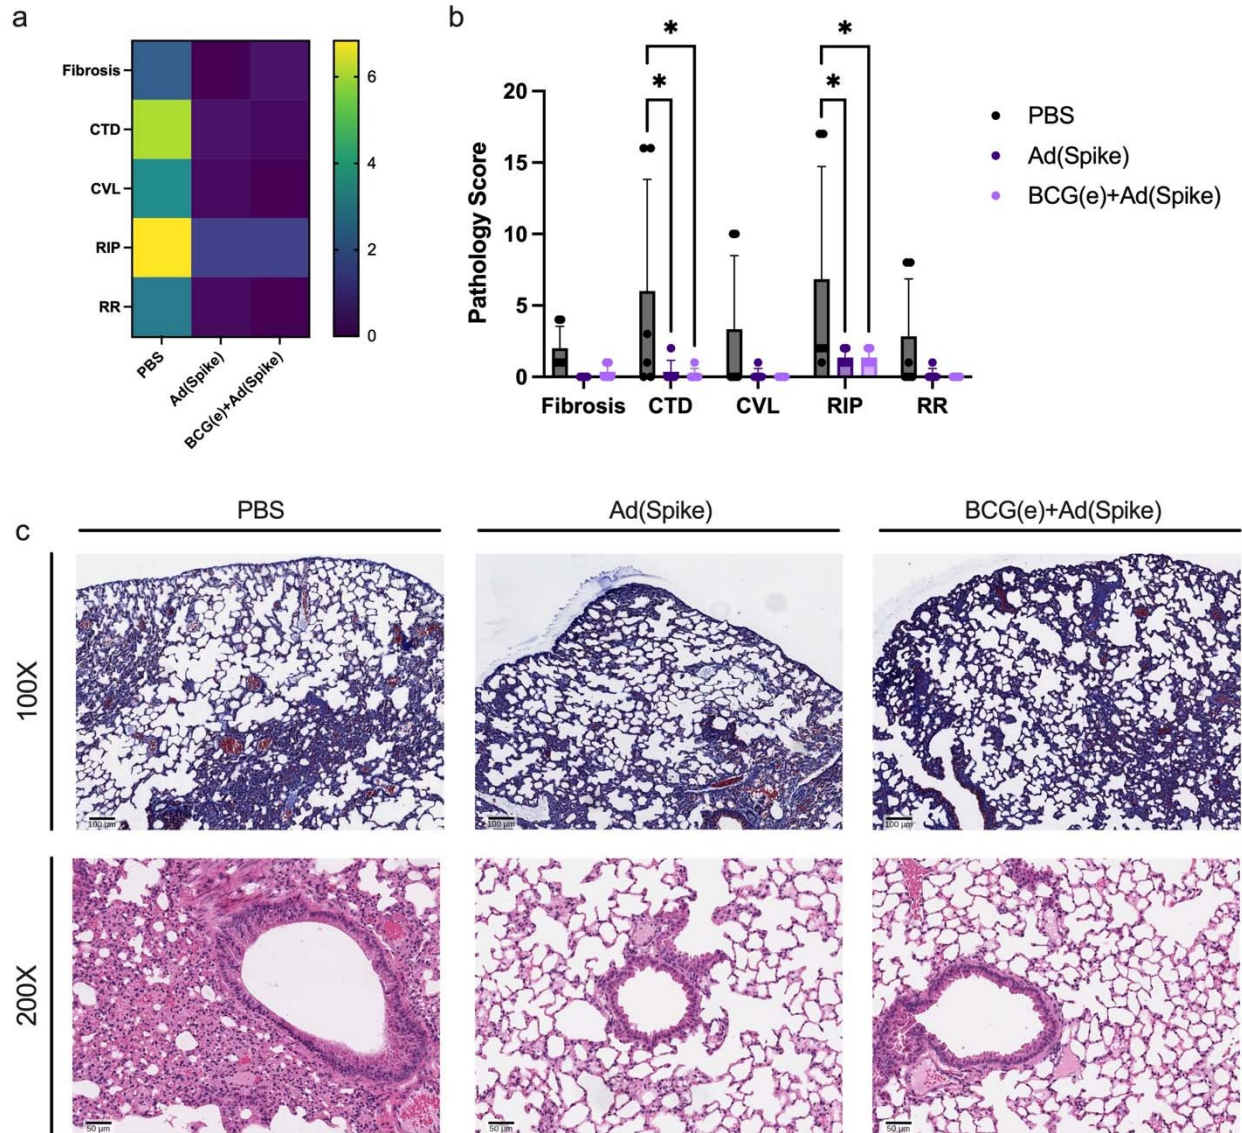

923

924

925 **Figure 3. SARS-CoV-2 induced pulmonary pathology is well prevented in Ad(Spike)**

926 **immunized mice, regardless of BCG exposure.**

927 **(a)** Heat map and **(b)** graphical summary of lung pathology (5 days post infection (dpi)) scored

928 in categories: Fibrosis, CTD, CVL, RIP, RR. CTD: Cell/tissue damage which is comprised of

929 bronchoepithelial necrosis (scored 1–3), inflammatory cells/debris in bronchi (1–3),

930 intraepithelial neutrophils (1–3) alveolar emphysema (Yes=1/No=0). CVL: Circulatory/vascular

931 lesions comprised of alveolar hemorrhage (Y/N), significant alveolar edema (Y/N),  
932 endothelial/vasculitis (1–3). RIP: Reaction/inflammatory patterns comprised of  
933 necrosis/suppurative bronchitis (Y/N), intra-alveolar macrophages (Y/N), mononuclear  
934 inflammation around airways (Y/N), neutrophilic/heterophilic inflammation (1–3), mesothelial  
935 reaction (1–3). RR: Regeneration/repair, includes alveolar epithelial cell  
936 regeneration/proliferation (1–3) and bronchiolar epithelial cells regeneration/proliferation (1–3).  
937 (c) Lungs of vaccinated animals, infected after 6 months, were harvested at 5 dpi and stained  
938 with Masson’s trichrome for fibrosis (top row) and H&E staining for pathology scoring (bottom  
939 row). Row one is imaged at 100X magnification (scale bar, 100  $\mu$ m). Row two is imaged at  
940 200X magnification (scale bar, 50  $\mu$ m) showing airway mononuclear inflammation in control  
941 animals. Each image is representative for the group. N=4-6. Data points represent individual  
942 mice, means  $\pm$  SD are shown. For (b), Two-way ANOVA with Tukey’s multiple comparisons:  
943 \*p<0.05.

944

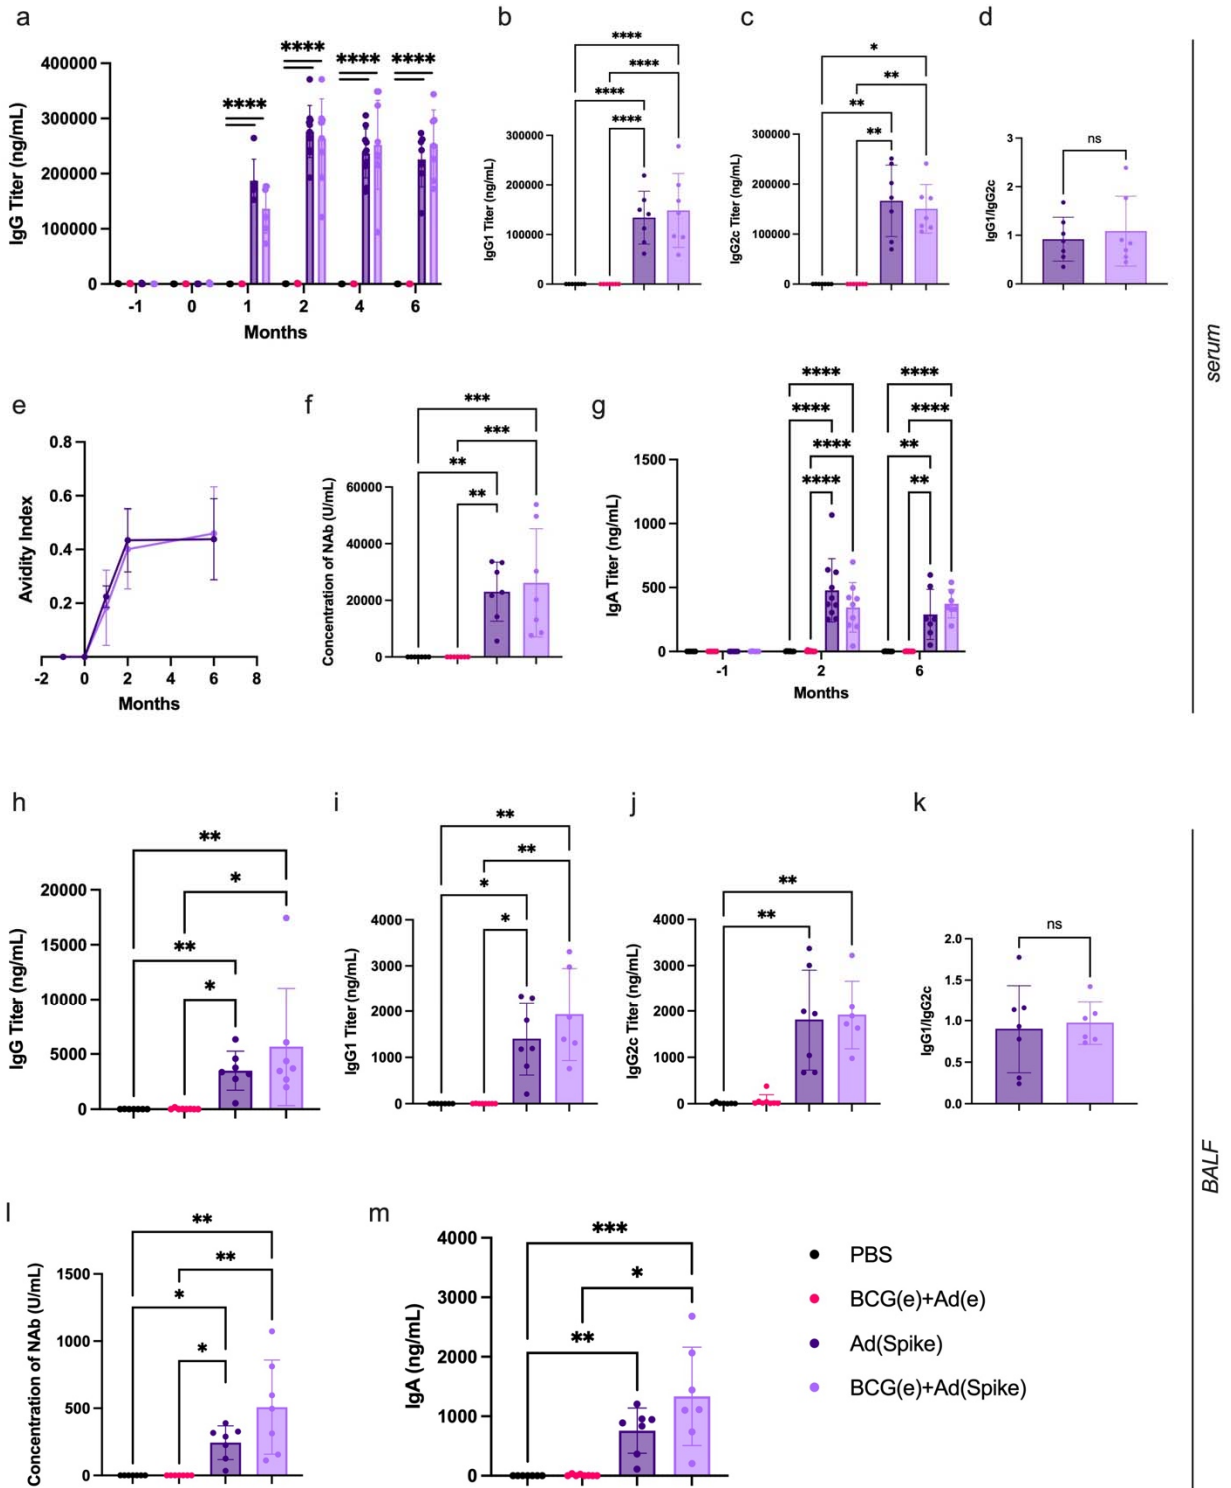

945

946

947 **Figure 4. Exposure to BCG does not significantly influence the quantity or quality of**  
948 **Ad(Spike) generated antibodies.**  
949 Spike-specific antibodies in the (a)-(g) serum and (h)-(m) bronchoalveolar lavage fluid (BALF).  
950 (a) IgG titers in mouse sera throughout the study schedule determined by ELISA. (b) IgG1 and  
951 (c) IgG2c at 6 months post-vaccination. The ratio of Spike-specific IgG1/IgG2c at 6 months post  
952 vaccination is given in (d). (e) IgG avidity index at -1, 0-, 1-, 2-, and 6-months post vaccination.  
953 (f) cPass determined antibody neutralization activity in serum at 6 months post vaccination. (g)  
954 IgA titers in mouse sera calculated at 0-, 3-, and 6-months post vaccination. N=7-10. Spike-  
955 specific (h) IgG, (i) IgG1, and (j) IgG2c with the ratio of IgG1/IgG2c given in (k). (l) cPass  
956 determined antibody neutralization activity in BALF at 6 months post vaccination. (m) IgA in  
957 BALF at 6 months post vaccination calculated by ELISA. N=7. Data points represent individual  
958 mice, means  $\pm$  SD are shown. The included legend applies to both serum and BALF data. For  
959 (a), (g), Two-way ANOVA with Tukey's multiple comparisons: \*\* $p < 0.01$ ; \*\*\*\* $p < 0.0001$ . For  
960 (b), (f), (k), One-way ANOVA with Tukey's multiple comparisons: \*\* $p < 0.01$ ; \*\*\* $p < 0.001$ ;  
961 \*\*\*\* $p < 0.0001$ ; ns = not significant. For (c), (d), (h)-(j), (l), (m), Kruskal-Wallis test with Dunn's  
962 multiple comparisons: \* $p < 0.05$ ; \*\* $p < 0.01$ ; \*\*\* $p < 0.001$ .

963

964

965

966

967

968

969

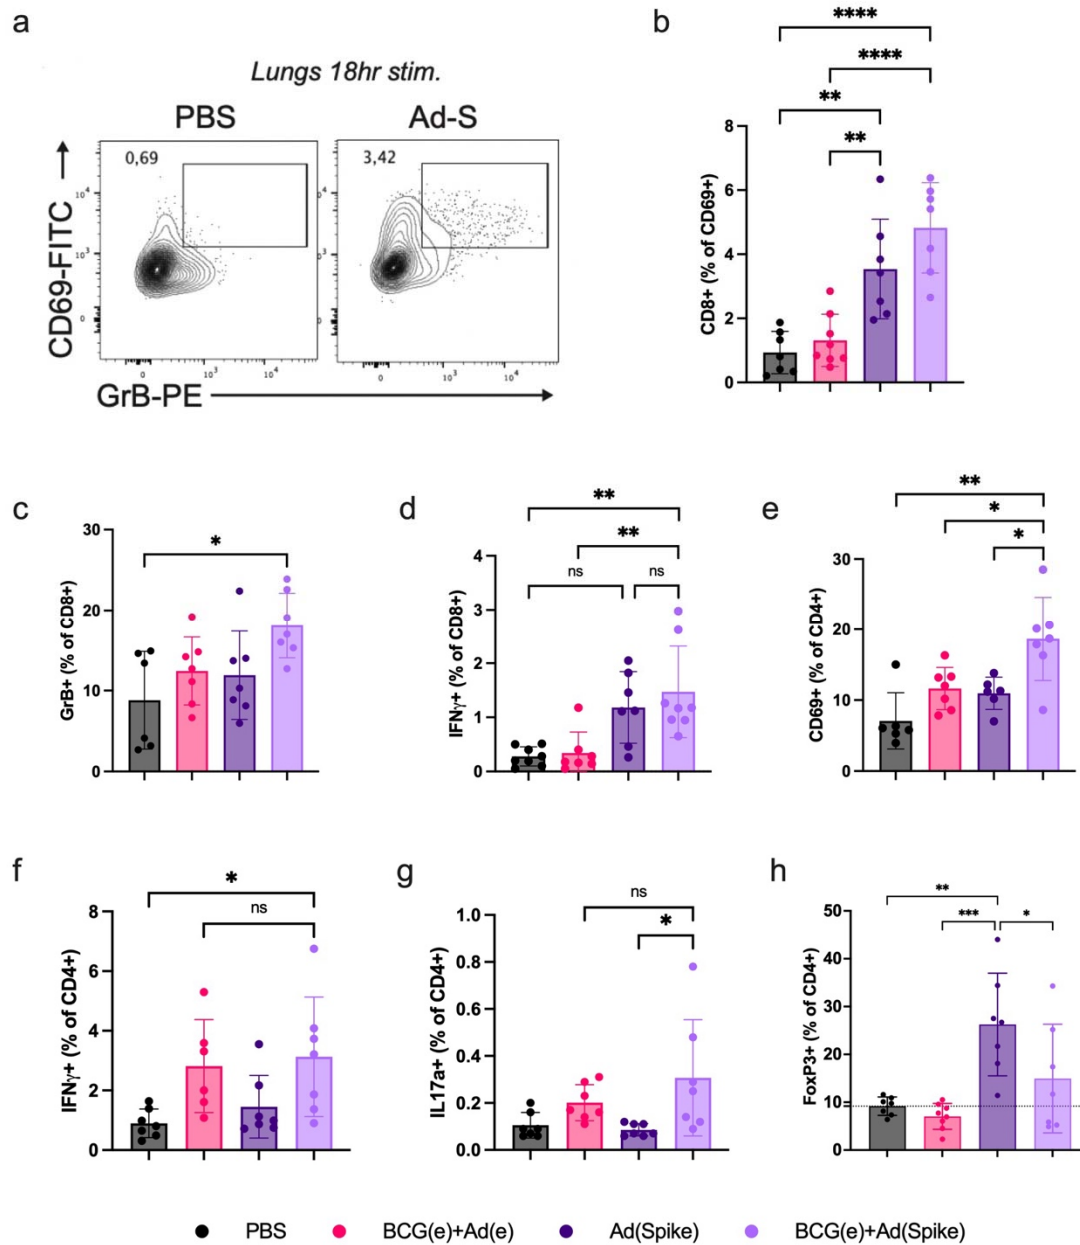

970

971 **Figure 5. BCG potentiates the generation of long-lasting cellular immunity**

972 Six months post-vaccination, cell mediated responses from lung cells were analysed following

973 18 hours restimulation with an S-protein peptide pool. **(a)** Expression of CD69 and GrB in

974 vaccinated animals compared to controls (Ad-S=Ad(Spike)). **(b)** Total frequency of

975 CD69+CD8+ T cells. The frequency of CD69+CD8+ T cells which are **(c)** GrB+ and **(d)**

976 IFN $\gamma$ +. **(e)** Frequency of CD69+ cells among the CD4+ population. **(f)** IFN $\gamma$ +, **(g)** IL17a, and **(h)**



977 FoxP3 expression was also determined from CD69+CD4+ T cells. N=7. Data points represent  
978 individual mice, means  $\pm$  SD are shown. For (b)-(h), One-way ANOVA with Tukey's multiple  
979 comparisons: \* $p < 0.05$ ; \*\* $p < 0.01$ ; \*\*\* $p < 0.001$ ; \*\*\*\* $p < 0.0001$ ; ns = not significant.  
980

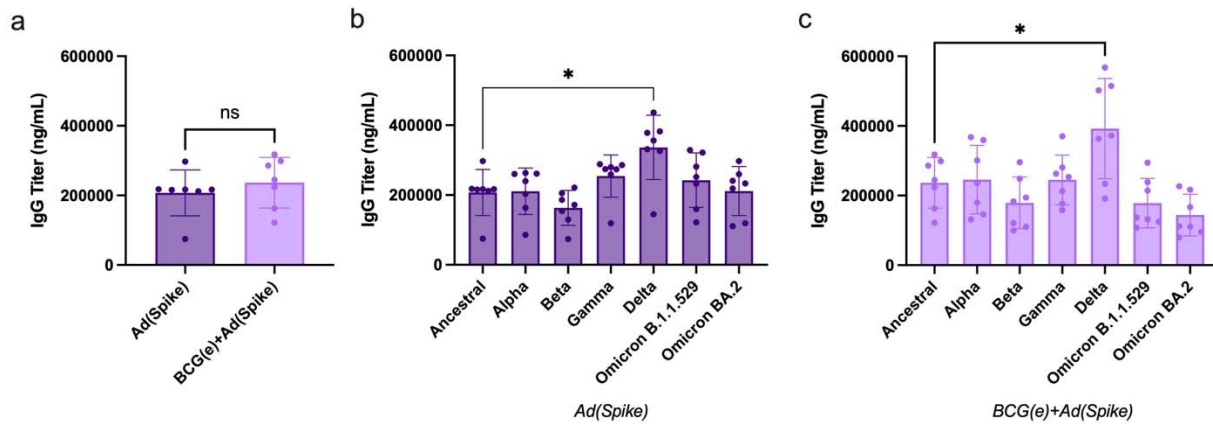

981  
982 **Figure 6. Production of cross-reactive antibodies to variant spike proteins is not altered by**  
983 **BCG.**

984 Spike-specific IgG was calculated from serum from vaccinated animals at 6 months post  
985 vaccination by ELISA. (a) Antibodies are shown against Spike Wuhan (Ancestral) strain. Cross-  
986 reactive antibodies from (b) Ad(Spike) vaccinated and (c) BCG pre-immunized and Ad(Spike)  
987 vaccinated animals were then assessed and compared to the ancestral strain. Antibodies binding  
988 strains B.1.1.7 (alpha), B.1.351 (beta), P.1 (gamma), B.1.617.2 (delta), B.1.1.529 (omicron), and  
989 BA.2 (omicron) were assessed. N=7. Data points represent individual mice, means  $\pm$  SD are  
990 shown. For (a), (b), Kruskal-Wallis test with Dunn's multiple comparisons: \* $p < 0.05$ ; ns = not  
991 significant. For (c), One-way ANOVA with Tukey's multiple comparisons: \* $p < 0.05$ ; ns = not  
992 significant.

993  
994 **Table 1. Animal groups**

| Group               | Prime (i.p.)                                                                                                                                                         | Boost (i.n.)                                                                                                                      |
|---------------------|----------------------------------------------------------------------------------------------------------------------------------------------------------------------|-----------------------------------------------------------------------------------------------------------------------------------|
| 1: PBS              | PBS                                                                                                                                                                  | PBS                                                                                                                               |
| 2: BCG(e)+Ad(e)     | 10 <sup>6</sup> colony forming units (cfu) of BCG (Danish strain) carrying an integrated, empty pMV361(Hygromycin <sup>R</sup> ) plasmid; referred to here as BCG(e) | 10 <sup>9</sup> TCID <sub>50</sub> of an empty, non-replicating human adenovirus serotype 5 vector; referred to here as Ad(e)     |
| 3: Ad(Spike)        | -                                                                                                                                                                    | 10 <sup>9</sup> TCID <sub>50</sub> of recombinant AdV expressing the full-length spike (S)-protein; referred to here as Ad(Spike) |
| 4: BCG(e)+Ad(Spike) | 10 <sup>6</sup> cfu of BCG(e)                                                                                                                                        | 10 <sup>9</sup> TCID <sub>50</sub> of Ad(Spike)                                                                                   |

995
